# Supplementary material
Source: PubMed Central journal article supplement (PMC4590768)
Supplement: NIHMS643350-supplement-2.pdf [file NIHMS643350-supplement-2.pdf]

Supplementary Tables

Supplementary Table 1: MAGE oligonucleotides.

| Name           | Sequence                                                                                      | Strategy |
|----------------|-----------------------------------------------------------------------------------------------|----------|
| acpP.high.1.NY | t*g*cttaacgcccagctgtccgcgataatcttctaacgcgttccatagatgctcactacttaaafttctctcaaaactcgtttc         | Tolerant |
| acpP.low.1.NY  | a*t*ttctcagcttcttcgctcgggaatcagatcatcaaaccttctcacagaccattaccagctcaacgggttcaagagaatccgcgccc    | Tolerant |
| acpP.med.1.NY  | g*t*aacttctctgcttaacgcccagctgtccgcgataatcttctaacgcgttctctgatagctcactactttaaaittctata          | Tolerant |
| aspS.high.1.NY | a*g*tgagcggatatttcagacgcgcttcttcggttgagctgttctagtaacggcagaaacatctcgcggttgatgatagtcagcagcag    | Tolerant |
| aspS.low.1.NY  | g*c*aaagctcggctctcagctatcagacacgctgcgccgctgtctacggaaagcgcgataacgctcagatattgctggtccgctcagc     | Tolerant |
| aspS.med.1.NY  | t*a*tttcagacgcgcttctcgggttgagctgtttagagctcaagctacagaaacatctcgcggttgatgatagtcagcagcagcagcagc   | Tolerant |
| can.high.1.NY  | a*t*agctcattgctcggcgaatgcccaagagcgcctctctgattagtgtgtaactgaacgctatggaacaggtgtataacctggccc      | Tolerant |
| can.low.1.NY   | g*t*accgtcagcggatctcaacctcaagctgaaacacgccaactgaaataaaatgccatgccggatgcaacacatcggcgaacttca      | Tolerant |
| can.med.1.NY   | a*a*ctgggcttatcaaacactgctgctcatalccgcgatatctgctcaaacatagctcattgctcggcgaatgcccaagagcgc         | Tolerant |
| cysS.high.1.NY | g*g*ttctcctccagcagcccaatacagcggaaagttaacgacagctaaagatgccattgccctcggcctccatctctctgcttctaga     | Tolerant |
| cysS.low.1.NY  | c*a*atagcgaattacttaccagcggcagctgtccctcggcgccctattccagcagatccccatctcgttaagacgatcagcgcgcca      | Tolerant |
| cysS.med.1.NY  | c*c*ttggcagcagtttctcagtgagttcaataatctcgcgctagctcgcgcgcgctccatctccggcgcagatgttcaaaa            | Tolerant |
| eno.high.1.NY  | g*t*gaattctcagaggtgaacgcttctgctcctcggcagcagctgattttaccattctttgagaattcaagagctcgcgagctcctc      | Tolerant |
| eno.low.1.NY   | t*t*acgacctgtgacggtcttcttcccgagcttctcagctaaatcagctggttatttagcaacagctgagaacggctcata            | Tolerant |
| eno.med.1.NY   | a*c*gaacgggattgtccatcgcgagcttccagagcttccagcgaactcagctaaagtagaagcactgacggagcagctccatccagcaaa   | Tolerant |
| era.high.1.NY  | t*c*ttccggagagtgatgagctcctcagctagatgcttaccgcaactcgcgcaatagctcaacattcaaccgggttccgagagatt       | Tolerant |
| era.low.1.NY   | c*a*tccagttactttaaagatcgtcaacgtaaccgagactcctctcgcgctcgtcgcggcccaaccggatttcaactttaccac         | Tolerant |
| era.med.1.NY   | c*a*gcgggtccttcaacgacaaaatcaccagctcaacatccctcaagagctgctcggcgtttgttcatcagcgggttaattggcgcgt     | Tolerant |
| fabG.high.1.NY | a*t*accggcattattgaccagatattccactcacaatatttccgcaaacgattcagatgagcgggctcgtcaca                   | Tolerant |
| fabG.low.1.NY  | a*c*atagcattttgcaaatcgcgctcagacatgcatccctgattcagatgcaaaagttaccctgtagtaagctcttctcgc            | Tolerant |
| fabG.med.1.NY  | t*c*tttcatcgcattaacaggttatacagagtgatcagcggcttctagcagcagatccacttcaacaaattctcgcgaaatcttcc       | Tolerant |
| glnS.high.1.NY | g*g*gttaatcaccagaggaatcatccgacacctgggttaggctgctgaacagagctcacaacagctcacaacagcttcaaccggcagcga   | Tolerant |
| glnS.low.1.NY  | a*c*cggttttcccgctgaaatggcggctatcagcagcaagactattaccgctcaactcggaaatgcttaccggcaaccgactttc        | Tolerant |
| glnS.med.1.NY  | t*c*cggttaccggtgttttaccgggtgctcagggctcggcgttctcggatctgctcggcctcagctcaacgtacgcccag             | Tolerant |
| groS.high.1.NY | c*c*atgcttgaataacagatgctcgaacttcaatcagctcagcggctcactcgcctttcaagatacggcattccgacagccagc         | Tolerant |
| groS.low.1.NY  | a*c*atccagcggctcactcctcctccttcaaggatagcggcattctgacagcagcacttccgcccgggtgatttagccgctcagag       | Tolerant |
| groS.med.1.NY  | a*c*gatccgcccagcagatttagttcaacttcttaccgcttaccacacgcgatacgaatggagcaatattcattgataactctct        | Tolerant |
| ispH.high.1.NY | c*c*gttatgtaccactctcgtacggaacatatactcgtcggcggctgactagcggcagcggcttttcaacaatgctgtagcgcggttacc   | Tolerant |
| ispH.low.1.NY  | c*c*cagctcgtcaaacgctccaccacattctcaccagaatctcaagcagatgcggcagctcagcggcatttaacctttc              | Tolerant |
| ispH.med.1.NY  | g*t*caaatcgcgacttttctcctgcttaccgctgagaaacctagctgctggagaaatcaggatcgcggctccggtactcgccta         | Tolerant |
| lepB.high.1.NY | t*t*ttcaacgttcttattcagtgatgctccggcagcggcctgctacgctgctgactcctccgcttttaggtcgaaaaagaattta        | Tolerant |
| lepB.low.1.NY  | a*c*taacggcagacaactggaacgaagatgcttataatgagcctcaaatgagcacttaagcagacagcagcggcctcctcttctc        | Tolerant |
| lepB.med.1.NY  | g*c*gttttcaacgcctcggcggactcactccgggttaatectctactcttttagaccggatcgaatgactttatcggcggtaaa         | Tolerant |
| murD.high.1.NY | a*t*accggagctcgcgacaatcagatcctccgcaatcagccttcaatcagactcggcgttgccttctcagcgttccgggtaattta       | Tolerant |
| murD.low.1.NY  | t*a*aacgcatcaactaactcctcgcagacggcgaactcattctatcgtttcaaaagtcttgaactgatcaaggtgctgcacagct        | Tolerant |
| murD.med.1.NY  | g*a*gggtgtttccagctggaaagctcagacttccagcagctacagctcaactcactcagtagtaacaaacagcagcagcgaatattg      | Tolerant |
| rplJ.high.1.NY | t*t*cgcaactcttgaacagacgagcagcagcggcggctgtctctaaagatgcaatcaggctcggaccaacaacgcgcttctcagg        | Tolerant |
| rplJ.high.2.NY | g*c*cagagtagcaaacgatttccagcggaaagcttcttcatgctacatcagcggctcaattgcttctctgtagctcgcgagattgcc      | Tolerant |
| rplJ.low.1.NY  | g*c*agcagcggcgggtgttccatagagatgcaatcagcggctcagcgaactcagcggcttctcagcggcagcggagtagcttcaaca      | Tolerant |
| rplJ.low.2.NY  | t*c*tttcatggttccatcagcgtgcaatgcttctcgtaggtctcagagattccagcggctcagctagagaccgggagcagctca         | Tolerant |
| rplJ.med.1.NY  | g*t*ctatttctacagttaccgacgggaatccgcaactcctcctacagcggccttctgctactcctcgtactcagcaacaatcgt         | Tolerant |
| rplJ.med.2.NY  | t*c*agctatttctacagttaccgacgggaatccgcaactcctcaagacagcggccttggctactcctcgtactcagcaacaatc         | Tolerant |
| rplM.high.1.NY | t*t*ttggcaactcctttaaaccgcttcaatcagcagcctcagcggctcagcgaactccttcaaaagctcgttttgataccaccg         | Tolerant |
| rplM.low.1.NY  | g*c*cattgctataatcccattagatgcaaaactcggcttctcagctcggctggttctcgttaccggcgtaaacttcaagttta          | Tolerant |
| rplM.med.1.NY  | a*g*ttcagtagccagcggccagagatttaccgctcgtcgaactcaatcagcggcttaccggttctctgatttagctgtaaaagt         | Tolerant |
| rplS.high.1.NY | a*c*taccggagagtgagctggaagacagcctcaacgcttccgctcaagaaattttagaagcgaatgcaagtagcagaccgggtta        | Tolerant |
| rplS.low.1.NY  | t*a*gttaagagctctttgatacagcagccttaccagctcctcagctagtagtagtagtagtagtagtagtagtagtagtagtagtagtag   | Tolerant |
| rplS.med.1.NY  | g*t*atcaccggagcgaaggaggtacgtcctcctctcttaccagttgcttaaatggttctcataatatttactcttctac              | Tolerant |
| rpmD.high.1.NY | c*c*cagcgaacagcagcttgccttcttccgagcagcagcagcagcagcagcagcagcagcagcagcagcagcagcagcagcagcagc      | Tolerant |
| rpmD.low.1.NY  | g*c*aggaatctcctcgcctcagcagcagcagcagcagcagcagcagcagcagcagcagcagcagcagcagcagcagcagcagcagcagc    | Tolerant |
| rpmD.med.1.NY  | g*c*cttctgttctcgcagcagcagcagcagcagcagcagcagcagcagcagcagcagcagcagcagcagcagcagcagcagcagcagc     | Tolerant |
| rpoA.high.1.NY | t*a*ggcaatcagcctccacagggctgtagcatcgtcagcagcagcagcagcagcagcagcagcagcagcagcagcagcagcagcagc      | Tolerant |
| rpoA.low.1.NY  | g*g*ccaatttccagcagcagcagcagcagcagcagcagcagcagcagcagcagcagcagcagcagcagcagcagcagcagcagcagc      | Tolerant |
| rpoA.med.1.NY  | a*g*gttagcagagatttccagagatcttctgaacgcttctctagctgtagtagtagtagtagtagtagtagtagtagtagtagtagtagtag | Tolerant |
| rpsB.high.1.NY | a*a*ctatttggggagttatcaagccttattactcagcttctcactgcttctcctcgggaaagccagatcctgagaacggccttca        | Tolerant |
| rpsB.low.1.NY  | g*c*agcaacagcggccagagctacagcagcagcagcagcagcagcagcagcagcagcagcagcagcagcagcagcagcagcagcagcagc   | Tolerant |
| rpsB.med.1.NY  | t*t*gttacttccagcagcagcagcagcagcagcagcagcagcagcagcagcagcagcagcagcagcagcagcagcagcagcagcagcagc   | Tolerant |
| rpsD.high.1.NY | a*a*cgacttctcatttggcagcagcagcagcagcagcagcagcagcagcagcagcagcagcagcagcagcagcagcagcagcagcagcagc  | Tolerant |
| rpsD.low.1.NY  | g*c*attgtctctcttctgactaagcttacttggatgaaagctagacatcagctgttctgtaattgctcagacagatcagaacgc         | Tolerant |
| rpsD.med.1.NY  | c*g*aaacttttcttctcagcagcagcagcagcagcagcagcagcagcagcagcagcagcagcagcagcagcagcagcagcagcagcagc    | Tolerant |



|             |                                                                                             |                |
|-------------|---------------------------------------------------------------------------------------------|----------------|
| tyrS.low.1  | t*a*ctgtttgttcagacagcggaagtcataaccctgcaacaggctttagaaaactcagtgaaacccctgatcttcacggttgaga      | Tolerant       |
| tyrS.med.18 | a*t*atcgccgaggaagtcagcacatcattatccgaaccagctctgcttccgccgagatgagagttttccacagtcgaaatcg         | Tolerant       |
| ftsL.N.1TAG | c*g*atcctttaaacttgccttagagcttctgctactctgctgactacatgcaatctgctcctctgcaatcgcgagaactgaaactcggca | Amino-terminal |
| ftsL.N.2TAG | c*g*atcctttaaacttgccttagagcttctgctactctgctgactacatgcaatctgctcctctgcaatcgcgagaactgaaactcgg   | Amino-terminal |
| ftsL.N.3TAG | g*a*tcctttaaacttgccttagagcttctgctactctgctgactacatgcaatctgctcctctgcaatcgcgagaactgaaactc      | Amino-terminal |
| ftsI.N.1TAG | t*t*ctctcagcttttggttctgcttttcgccgctgctttctactacatgctgcgcgtttatctatftttgcaactacgataatcttctg  | Amino-terminal |
| ftsI.N.2TAG | t*t*ctctcagcttttggttctgcttttcgccgctgctttctactacatgctgcgcgtttatctatftttgcaactacgataatcttctg  | Amino-terminal |
| ftsI.N.3TAG | c*f*tctcagcttttggttctgcttttcgccgctgctttctactacatgctgcgcgtttatctatftttgcaactacgataatcttctg   | Amino-terminal |
| murD.N.1TAG | g*c*ccagggcgataatgacgacatfttaccctgataatcagcctactacatgattaacgtactcagcgttgcagaccaatcagaaccg   | Amino-terminal |
| murD.N.2TAG | g*c*ccagggcgataatgacgacatfttaccctgataatcagcctactacatgattaacgtactcagcgttgcagaccaatcagaacc    | Amino-terminal |
| murD.N.3TAG | c*c*aggccgataatgacgacatfttaccctgataatcagcctactacatgattaacgtactcagcgttgcagaccaatcagaacc      | Amino-terminal |
| ftsA.N.1TAG | a*a*tctcactactaccagtttctgctcgccttactactacatggttctgctgctgctgatttggctgagtagattcc              | Amino-terminal |
| ftsA.N.2TAG | c*t*cagctcactactaccagtttctgctcgccttactactacatggttctgctgctgctgatttggctgagtagattcc            | Amino-terminal |
| ftsA.N.3TAG | t*c*cagctcactactaccagtttctgctcgccttactactacatggttctgctgctgctgatttggctgagtagattcc            | Amino-terminal |
| ftsZ.N.1TAG | g*a*ctttaaaccgcgctcattgtaagttccattggttcaaacatagatttctcctcctgatttgcctctgctgagccgtaatac       | Amino-terminal |
| ftsZ.N.2TAG | g*a*ctttaaaccgcgctcattgtaagttccattggttcaaacatagatttctcctcctgatttgcctctgctgagccgtaatac       | Amino-terminal |
| ftsZ.N.3TAG | a*c*ttaaaccgcgctcattgtaagttccattggttcaaacatagatttctcctcctgatttgcctctgctgagccgtaatac         | Amino-terminal |
| secA.N.1TAG | a*t*cgttaccgactaccgaaactttagtaaacatfttgattagctactacataaaatcctcaaacgcccccgttgcgagttataaaatg  | Amino-terminal |
| secA.N.2TAG | a*t*cgttaccgactaccgaaactttagtaaacatfttgattagctactacataaaatcctcaaacgcccccgttgcgagttataaaatg  | Amino-terminal |
| secA.N.3TAG | t*c*cgttaccgactaccgaaactttagtaaacatfttgattagctactacataaaatcctcaaacgcccccgttgcgagttataaaatg  | Amino-terminal |
| frn.N.1TAG  | t*t*gtccatcgctactcagcatctttctgatacgtactactacagctaacctgtaaaactgtctcagtcagaccagacagt          | Amino-terminal |
| frn.N.2TAG  | t*t*gtccatcgctactcagcatctttctgatacgtactactacagctaacctgtaaaactgtctcagtcagaccagacagt          | Amino-terminal |
| frn.N.3TAG  | t*g*ccatcgctactcagcatctttctgatacgtactactacagctaacctgtaaaactgtctcagtcagaccagacagt            | Amino-terminal |
| accA.N.1TAG | c*a*gctctgcaatcgctgttcaaaatcaagaaatcagactcactacatgatttctctgatttgcctctgctgagccgtaatac        | Amino-terminal |
| accA.N.2TAG | c*a*gctctgcaatcgctgttcaaaatcaagaaatcagactcactacatgatttctctgatttgcctctgctgagccgtaatac        | Amino-terminal |
| accA.N.3TAG | a*g*ctctgcaatcgctgttcaaaatcaagaaatcagactcactacatgatttctctgatttgcctctgctgagccgtaatac         | Amino-terminal |
| dxs.N.1TAG  | a*f*ccagcgtataataaacaataaagtattaataggccctgatgtagagtttggatattgccaaatcccaccctggcactgtctcag    | Amino-terminal |
| dxs.N.2TAG  | c*a*gcgtaataaataaacaataaagtattaataggccctgatgtagagtttggatattgccaaatcccaccctggcactgtctcag     | Amino-terminal |
| dxs.N.3TAG  | a*g*cgtaataaataaacaataaagtattaataggccctgatgtagagtttggatattgccaaatcccaccctggcactgtctcag      | Amino-terminal |
| glnS.N.1TAG | g*a*ctcagcgtataaagtttagtgcggcgcttctcctcactactacatgctgattcctcaaacgctaaacaacgtataacggcgtatg   | Amino-terminal |
| glnS.N.2TAG | a*f*ctcagcgtataaagtttagtgcggcgcttctcctcactactacatgctgattcctcaaacgctaaacaacgtataacggcgtatg   | Amino-terminal |
| glnS.N.3TAG | t*c*ctcagcgtataaagtttagtgcggcgcttctcctcactactacatgctgattcctcaaacgctaaacaacgtataacggcgtatg   | Amino-terminal |
| prsA.N.1TAG | c*a*gattcttccaccaatggacgatcctgagggttctctctgtagctgatagaagcttttgcgttaacgccaccgccgaacta        | Amino-terminal |
| prsA.N.2TAG | a*t*cttccaccaatggacgatcctgagggttctctctgtagctgatagaagcttttgcgttaacgccaccgccgaacta            | Amino-terminal |
| prsA.N.3TAG | t*t*cttccaccaatggacgatcctgagggttctctctgtagctgatagaagcttttgcgttaacgccaccgccgaacta            | Amino-terminal |
| nadE.N.1TAG | t*a*ctttaaaggagtttcttctctgctggagggttcaatgtagacattgcaacaacaataataaaggcctggcgcaaaaccg         | Amino-terminal |
| nadE.N.2TAG | c*f*taaaggagtttcttctctgctggagggttcaatgtagacattgcaacaacaataataaaggcctggcgcaaaaccg            | Amino-terminal |
| nadE.N.3TAG | t*t*taaaggagtttcttctctgctggagggttcaatgtagacattgcaacaacaataataaaggcctggcgcaaaaccg            | Amino-terminal |
| pgsA.N.1TAG | g*a*tgacacggaacagtgtaagcaacgtaggatattaaatgctactacataatgacgggtaactatcttctcagtaagattaccct     | Amino-terminal |
| pgsA.N.2TAG | g*a*tgacacggaacagtgtaagcaacgtaggatattaaatgctactacataatgacgggtaactatcttctcagtaagattaccct     | Amino-terminal |
| pgsA.N.3TAG | t*g*acacggaacagtgtaagcaacgtaggatattaaatgctactacataatgacgggtaactatcttctcagtaagattaccct       | Amino-terminal |
| nrdB.N.1TAG | a*a*aatccttaccgctaaactccaacaggacacactcatgtagcattataccacctttcacagcagaaatgatcagctcaaa         | Amino-terminal |
| nrdB.N.2TAG | a*f*aatccttaccgctaaactccaacaggacacactcatgtagcattataccacctttcacagcagaaatgatcagctcaaa         | Amino-terminal |
| nrdB.N.3TAG | t*g*aatccttaccgctaaactccaacaggacacactcatgtagcattataccacctttcacagcagaaatgatcagctcaaa         | Amino-terminal |
| gltX.N.1TAG | c*a*gatagcctgttggcttggcggaagcgagtttgaatttctactacatgaaatggccttactgttgaagaatgccgacaaccggcaat  | Amino-terminal |
| gltX.N.2TAG | c*a*gatagcctgttggcttggcggaagcgagtttgaatttctactacatgaaatggccttactgttgaagaatgccgacaaccggcaat  | Amino-terminal |
| gltX.N.3TAG | g*a*gatagcctgttggcttggcggaagcgagtttgaatttctactacatgaaatggccttactgttgaagaatgccgacaaccggcaat  | Amino-terminal |
| lepB.N.1TAG | c*a*ccagtggtgcaatcaccgaatcaggcacaacatattcctactacatgccaactcctaaagggttatttcttctccgacgtcag     | Amino-terminal |
| lepB.N.2TAG | c*a*ccagtggtgcaatcaccgaatcaggcacaacatattcctactacatgccaactcctaaagggttatttcttctccgacgtcag     | Amino-terminal |
| lepB.N.3TAG | c*c*agtggtgcaatcaccgaatcaggcacaacatattcctactacatgccaactcctaaagggttatttcttctccgacgtcag       | Amino-terminal |
| trmD.N.1TAG | t*g*cgcggaacatttcagaaacaggctaaatgccaatccactactacatgcccctttttaccgtttatccgggttttaaaaccag      | Amino-terminal |
| trmD.N.2TAG | t*g*cgcggaacatttcagaaacaggctaaatgccaatccactactacatgcccctttttaccgtttatccgggttttaaaaccag      | Amino-terminal |
| trmD.N.3TAG | c*g*cggaacatttcagaaacaggctaaatgccaatccactactacatgcccctttttaccgtttatccgggttttaaaaccag        | Amino-terminal |
| grpE.N.1TAG | t*t*cggggcttggccctcaggcgtttcttcttactactactacatgaaatctccgcgttttttccgattcattctcgtcaactctg     | Amino-terminal |
| grpE.N.2TAG | t*t*cggggcttggccctcaggcgtttcttcttactactactacatgaaatctccgcgttttttccgattcattctcgtcaactctg     | Amino-terminal |
| grpE.N.3TAG | c*c*cggggcttggccctcaggcgtttcttcttactactactacatgaaatctccgcgttttttccgattcattctcgtcaactctg     | Amino-terminal |
| metK.N.1TAG | a*a*cagtttagctaaccaaaactcttttaggtgatataaatatgtaggcaaaacaccttttacgtccgagctctctgaaaggcat      | Amino-terminal |
| metK.N.2TAG | a*g*tttagctaaccaaaactcttttaggtgatataaatatgtaggcaaaacaccttttacgtccgagctctctgaaaggcat         | Amino-terminal |
| metK.N.3TAG | g*t*tttagctaaccaaaactcttttaggtgatataaatatgtaggcaaaacaccttttacgtccgagctctctgaaaggcat         | Amino-terminal |
| infB.N.1TAG | g*g*ctctgctctcggccagcgttttaactcttactacatgctgttctctctgctacgatttatccgtctcaccgaa               | Amino-terminal |
| infB.N.2TAG | g*g*ctctgctctcggccagcgttttaactcttactacatgctgttctctctgctacgatttatccgtctcaccgaa               | Amino-terminal |

|             |                                                                                             |                |
|-------------|---------------------------------------------------------------------------------------------|----------------|
| infB.N.3TAG | t*c*tgtcgtctcggccagcgttttaactgtttactgtctactactacatgctgtctctctctacagtttfaacgcttcgtac         | Amino-terminal |
| fmt.N.1TAG  | a*c*tggatcgtctgaaagcccgggcttaaggataaagaactacgtgtagtcagaatcactactgattatftttcgggtacacctgacttt | Amino-terminal |
| fmt.N.2TAG  | g*g*atcgtctgaaagcccgggcttaaggataaagaactacgtgtagtcagaatcactactgattatftttcgggtacacctgacttt    | Amino-terminal |
| fmt.N.3TAG  | g*a*tcgtctgaaagcccgggcttaaggataaagaactacgtgtagtcagaatcactactgattatftttcgggtacacctgact       | Amino-terminal |
| secY.N.1TAG | g*c*caccttggcactttgaaaactaactcccgggttttagcctactactctactctacttctcctgatttaccggcagcagcttcgatag | Amino-terminal |
| secY.N.2TAG | g*c*caccttggcactttgaaaactaactcccgggttttagcctactactctactctacttctcctgatttaccggcagcagcttcga    | Amino-terminal |
| secY.N.3TAG | c*a*ccttggcactttgaaaactaactcccgggttttagcctactactctactctacttctcctgatttaccggcagcagcttcg       | Amino-terminal |
| rplO.N.1TAG | c*g*ccttttggagccttcggccggagacagagtattaaacgctactactctactctcctcaacttaccatgaaggaaaccgcttgat    | Amino-terminal |
| rplO.N.2TAG | c*g*ccttttggagccttcggccggagacagagtattaaacgctactactctactctcctcaacttaccatgaaggaaaccgcttg      | Amino-terminal |
| rplO.N.3TAG | c*c*tttttggagccttcggccggagacagagtattaaacgctactactctactctcctcaacttaccatgaaggaaaccgct         | Amino-terminal |
| rpsE.N.1TAG | c*a*gcttttctcagcttcggcagcagcttttttcgatgtgagcctactactctactctcctcaacttaccatgaaggaaaccgct      | Amino-terminal |
| rpsE.N.2TAG | c*a*gcttttctcagcttcggcagcagcttttttcgatgtgagcctactactctactctcctcaacttaccatgaaggaaaccgct      | Amino-terminal |
| rpsE.N.3TAG | g*c*t*tttctcagcttcggcagcagcttttttcgatgtgagcctactactctactctcctcaacttaccatgaaggaaaccgct       | Amino-terminal |
| rpsN.N.1TAG | g*t*ttactctcgtctcttctgattgcttagcctactactctactctcctcaacttaccatgaaggaaaccgct                  | Amino-terminal |
| rpsN.N.2TAG | g*t*ttactctcgtctcttctgattgcttagcctactactctactctcctcaacttaccatgaaggaaaccgct                  | Amino-terminal |
| rpsN.N.3TAG | t*t*ttactctcgtctcttctgattgcttagcctactactctactctcctcaacttaccatgaaggaaaccgct                  | Amino-terminal |
| rplN.N.1TAG | a*c*cggagttgtcggcagcttcagcatagctcttcttgatctactactctactctcctcaacttaccatgaaggaaaccgct         | Amino-terminal |
| rplN.N.2TAG | a*c*cggagttgtcggcagcttcagcatagctcttcttgatctactactctactctcctcaacttaccatgaaggaaaccgct         | Amino-terminal |
| rplN.N.3TAG | c*c*ggagttgtcggcagcttcagcatagctcttcttgatctactactactctcctcaacttaccatgaaggaaaccgct            | Amino-terminal |
| rpsQ.N.1TAG | a*a*caacgcagcttcgagagtagcagcttttatcggctactactactctcctcaacttaccatgaaggaaaccgct               | Amino-terminal |
| rpsQ.N.2TAG | a*a*caacgcagcttcgagagtagcagcttttatcggctactactactctcctcaacttaccatgaaggaaaccgct               | Amino-terminal |
| rpsQ.N.3TAG | c*a*acgcagcttcgagagtagcagcttttatcggctactactactctcctcaacttaccatgaaggaaaccgct                 | Amino-terminal |
| rplD.N.1TAG | g*g*aaacagtcagcgcgctctcgcgcttctcaactactactactctcctcaacttaccatgaaggaaaccgct                  | Amino-terminal |
| rplD.N.2TAG | g*g*aaacagtcagcgcgctctcgcgcttctcaactactactactctcctcaacttaccatgaaggaaaccgct                  | Amino-terminal |
| rplD.N.3TAG | a*a*acagtcagcgcgctctcgcgcttctcaactactactactctcctcaacttaccatgaaggaaaccgct                    | Amino-terminal |
| rplC.N.1TAG | g*a*agatacgggtcatacccactttttaccgactaaacactactactactctcctcaacttaccatgaaggaaaccgct            | Amino-terminal |
| rplC.N.2TAG | g*a*agatacgggtcatacccactttttaccgactaaacactactactactctcctcaacttaccatgaaggaaaccgct            | Amino-terminal |
| rplC.N.3TAG | a*g*atagcgggtcatacccactttttaccgactaaacactactactactctcctcaacttaccatgaaggaaaccgct             | Amino-terminal |
| fusA.N.1TAG | g*a*taccgatgttacgtagcgtcgcgatgggtgtgtacgagcctactactctcctcaacttaccatgaaggaaaccgct            | Amino-terminal |
| fusA.N.2TAG | g*a*taccgatgttacgtagcgtcgcgatgggtgtgtacgagcctactactctcctcaacttaccatgaaggaaaccgct            | Amino-terminal |
| fusA.N.3TAG | t*a*ccgatgttacgtagcgtcgcgatgggtgtgtacgagcctactactactctcctcaacttaccatgaaggaaaccgct           | Amino-terminal |
| rpoC.N.1TAG | t*t*cgggttttagtctcgcgtttcagaacttataaacttctactactactactctcctcaacttaccatgaaggaaaccgct         | Amino-terminal |
| rpoC.N.2TAG | t*t*cgggttttagtctcgcgtttcagaacttataaacttctactactactactctcctcaacttaccatgaaggaaaccgct         | Amino-terminal |
| rpoC.N.3TAG | c*g*gttttagtctcgcgtttcagaacttataaacttctactactactactctcctcaacttaccatgaaggaaaccgct            | Amino-terminal |
| ppa.N.1TAG  | t*a*ctcggcactgtttgcccacatattttaaaggaaacagacatgtagagcttactcaactcctcgggtaaaagatctgccggaagac   | Amino-terminal |
| ppa.N.2TAG  | t*c*ggcactgtttgcccacatattttaaaggaaacagacatgtagagcttactcaactcctcgggtaaaagatctgccggaagac      | Amino-terminal |
| ppa.N.3TAG  | c*g*gcactgtttgcccacatattttaaaggaaacagacatgtagagcttactcaactcctcgggtaaaagatctgccggaagac       | Amino-terminal |
| dnaA.W6     | t*t*ctgtgctgtaactactctcgaactcagcagctgtcgtctaaagcgaagtgacacggcggactcactcgaacaaagtcga         | Functional     |
| fusA.F32    | a*g*cgcctcactcttctcgaatgattttatggtttacacggctgtactacagaatgcttcgtagtagtgttttaccggcgtcgtatgtg  | Functional     |
| glyQ.Y226   | c*g*gcagcggatttccagcggcagcagctcgcgcttctctctactcgtcgaagcaggtgaacaggaagccacatccgctattc        | Functional     |
| Int.Y388    | c*c*gcctcctcctcgaatgattttgacttactcgcgctatttctgtaggagatcattctcggcagcaagtcgcgataactccgccggat  | Functional     |
| murG.F243   | a*a*cgacgacatccgccacgcatacggccgccatcatatcaatctattccgctacttattgctcgggttcccccttcggcatacgc     | Functional     |
| rpoA.Y152   | t*g*ggcctcactcttctcgaatgattttatggtttacacggctgtactacagaatgcttcgtagtagtgttttaccggcgtcgtatgtg  | Functional     |
| serS.F213   | g*t*ctgcttcttccagcggacgagatgtagaagcagcggcagcttactctcctcctcaacttaccatgaaggaaaccgct           | Functional     |
| thrS.Y313   | g*c*agttaccgcttccagaagatgtgtgaacattgcatcttctggttcccagtgaccggtttttccacagacacggtccat          | Functional     |

Asterisk (\*) signifies a phosphorothioate bond. Oligonucleotides are grouped by strategy (Tolerant, Amino-terminal, and Functional).

**Supplementary Table 2: MAGE pools for the introduction of TAG codons in essential genes.**

| Y             | NY             | N           | C1           | C2           | F                                   |
|---------------|----------------|-------------|--------------|--------------|-------------------------------------|
| acpP.low.3    | acpP.high.1.NY | ftsL.N.1TAG | dnaX.high.20 | dnaX.high.20 | dnaA.W6                             |
| can.high.20.a | acpP.low.1.NY  | ftsI.N.1TAG | dnaX.low.5   | lspA.high.20 | fusA.F32                            |
| can.high.20.b | acpP.med.1.NY  | murD.N.1TAG | dnaX.med.16  | lspA.med.15  | glyQ.Y226                           |
| can.low.2     | aspS.high.1.NY | ftsA.N.1TAG | dxs.high.20  | secY.low.1   | Int.Y388                            |
| dnaX.high.20  | aspS.low.1.NY  | ftsZ.N.1TAG | dxs.low.6    | secY.med.18  | murG.F243                           |
| dnaX.low.5    | aspS.med.1.NY  | secA.N.1TAG | dxs.med.11   | topA.med.14  | rpoA.Y152                           |
| dnaX.med.16   | can.high.1.NY  | frr.N.1TAG  | eno.high.20  | dxs.N.1TAG   | thrS.Y313                           |
| dxs.high.20   | can.low.1.NY   | accA.N.1TAG | rplB.high.20 | ftsI.N.1TAG  |                                     |
| dxs.low.6     | can.med.1.NY   | dxs.N.1TAG  | rplB.low.1.a | murD.N.1TAG  | serS.F213 was included in this pool |
| dxs.med.11    | cysS.high.1.NY | glnS.N.1TAG | secY.high.20 |              |                                     |
| eno.high.20   | cysS.low.1.NY  | prsA.N.1TAG | secY.low.1   |              |                                     |
| eno.low.2.a   | cysS.med.1.NY  | nadE.N.1TAG | secY.med.18  |              |                                     |
| eno.low.2.b   | eno.high.1.NY  | pgsA.N.1TAG | trmD.low.2   |              |                                     |
| fabG.high.20  | eno.low.1.NY   | nrdB.N.1TAG | trmD.med.16  |              |                                     |
| fabG.low.1    | eno.med.1.NY   | gltX.N.1TAG | tyrS.med.18  |              |                                     |
| fabG.med.18   | era.high.1.NY  | lepB.N.1TAG | dxs.N.1TAG   |              |                                     |
| ispH.low.1    | era.low.1.NY   | trmD.N.1TAG | dxs.N.2TAG   |              |                                     |
| ispH.med.10   | era.med.1.NY   | grpE.N.1TAG | dxs.N.3TAG   |              |                                     |
| ispH.med.11   | fabG.high.1.NY | metK.N.1TAG | grpE.N.1TAG  |              |                                     |
| lspA.high.20  | fabG.low.1.NY  | infB.N.1TAG | grpE.N.2TAG  |              |                                     |
| lspA.low.3    | fabG.med.1.NY  | fnt.N.1TAG  | grpE.N.3TAG  |              |                                     |
| lspA.med.15   | glnS.high.1.NY | secY.N.1TAG | rplO.N.1TAG  |              |                                     |
| pheT.high.20  | glnS.low.1.NY  | rplO.N.1TAG | rplO.N.2TAG  |              |                                     |
| pheT.low.2    | glnS.med.1.NY  | rpsE.N.1TAG | rplO.N.3TAG  |              |                                     |
| pheT.med.14   | groS.high.1.NY | rpsN.N.1TAG | secY.N.1TAG  |              |                                     |
| rplB.high.20  | groS.low.1.NY  | rplN.N.1TAG | secY.N.2TAG  |              |                                     |
| rplB.low.1.a  | groS.med.1.NY  | rpsO.N.1TAG | secY.N.3TAG  |              |                                     |
| rplB.low.1.b  | ispH.high.1.NY | rplD.N.1TAG | trmD.N.1TAG  |              |                                     |
| rplJ.low.4    | ispH.low.1.NY  | rplC.N.1TAG | trmD.N.2TAG  |              |                                     |
| rplJ.med.10   | ispH.med.1.NY  | fusA.N.1TAG | trmD.N.3TAG  |              |                                     |
| rplJ.med.13   | lepB.high.1.NY | rpoC.N.1TAG |              |              |                                     |
| rplM.low.2    | lepB.low.1.NY  | ppa.N.1TAG  |              |              |                                     |
| rplM.low.4    | lepB.med.1.NY  |             |              |              |                                     |
| rplM.low.5    | murD.high.1.NY |             |              |              |                                     |
| rplS.low.1    | murD.low.1.NY  |             |              |              |                                     |
| rplS.low.2    | murD.med.1.NY  |             |              |              |                                     |
| rpmB.low.4    | rplJ.high.1.NY |             |              |              |                                     |
| rpsD.low.1    | rplJ.high.2.NY |             |              |              |                                     |
| rpsD.low.5    | rplJ.low.1.NY  |             |              |              |                                     |
| rpsK.low.8    | rplJ.low.2.NY  |             |              |              |                                     |
| rpsL.low.1    | rplJ.med.1.NY  |             |              |              |                                     |
| rpsL.low.2    | rplJ.med.2.NY  |             |              |              |                                     |
| rpsP.low.2    | rplM.high.1.NY |             |              |              |                                     |
| secY.high.20  | rplM.low.1.NY  |             |              |              |                                     |
| secY.low.1    | rplM.med.1.NY  |             |              |              |                                     |
| secY.med.18   | rplS.high.1.NY |             |              |              |                                     |
| topA.high.20  | rplS.low.1.NY  |             |              |              |                                     |
| topA.low.5    | rplS.med.1.NY  |             |              |              |                                     |
| topA.med.14   | rpmD.high.1.NY |             |              |              |                                     |
| trmD.low.2    | rpmD.low.1.NY  |             |              |              |                                     |
| trmD.low.4    | rpmD.med.1.NY  |             |              |              |                                     |
| trmD.med.16   | rpoA.high.1.NY |             |              |              |                                     |
| tyrS.low.1    | rpoA.low.1.NY  |             |              |              |                                     |
| tyrS.med.18   | rpoA.med.1.NY  |             |              |              |                                     |
|               | rpsB.high.1.NY |             |              |              |                                     |

|  |                |  |  |  |  |
|--|----------------|--|--|--|--|
|  | rpsB.low.1.NY  |  |  |  |  |
|  | rpsB.med.1.NY  |  |  |  |  |
|  | rpsD.high.1.NY |  |  |  |  |
|  | rpsD.low.1.NY  |  |  |  |  |
|  | rpsD.med.1.NY  |  |  |  |  |
|  | thrS.high.1.NY |  |  |  |  |
|  | thrS.low.1.NY  |  |  |  |  |
|  | thrS.med.1.NY  |  |  |  |  |
|  | trmD.high.1.NY |  |  |  |  |
|  | trmD.high.2.NY |  |  |  |  |
|  | trmD.low.1.NY  |  |  |  |  |
|  | trmD.low.2.NY  |  |  |  |  |
|  | trmD.med.1.NY  |  |  |  |  |
|  | trmD.med.2.NY  |  |  |  |  |

Oligonucleotides within each pool were designed by a single or combination ("complex" pools) of strategies. Pool names are abbreviated as follows: Tolerant tyrosine (Y), tolerant non-tyrosine (NY), amino-terminal (N), complex 1 (C1), complex 2 (C2), and functional (F) pools.

**Supplementary Table 3: Analysis of sAA-dependence screens.**

| sAA  | aaRS    | Pool <sup>a</sup> | MAGE cycles | Total screened | Total dependent | Unique dependent | Unique 1TAG      | Unique 2TAG      | Unique 3TAG      | Unique 4TAG      |
|------|---------|-------------------|-------------|----------------|-----------------|------------------|------------------|------------------|------------------|------------------|
| pAcF | pAcF-RS | Y                 | 4           | 88             | 3               | 3                | 2                | 1                | 0                | 0                |
| pAcF | pAcF-RS | NY                | 4           | 88             | 0               | 0                | n/a <sup>b</sup> | n/a <sup>b</sup> | n/a <sup>b</sup> | n/a <sup>b</sup> |
| pAcF | pAcF-RS | N                 | 4           | 88             | 2               | 2                | 2                | 0                | 0                | 0                |
| pAcF | pAcF-RS | C1                | 4           | 93             | 3               | 3                | 3                | 0                | 0                | 0                |
| pAcF | pAcF-RS | F                 | 8           | 86             | 0               | 0                | n/a <sup>b</sup> | n/a <sup>b</sup> | n/a <sup>b</sup> | n/a <sup>b</sup> |
| pAzF | pAzF-RS | C2                | 3           | 255            | 0               | 0                | n/a <sup>b</sup> | n/a <sup>b</sup> | n/a <sup>b</sup> | n/a <sup>b</sup> |
| pAzF | pCNF-RS | Y                 | 4           | 130            | 13              | 8                | 4                | 3                | 0                | 1                |
| pAzF | pCNF-RS | N                 | 4           | 84             | 8               | 4                | 3                | 1                | 0                | 0                |
| pAzF | pCNF-RS | C2                | 4           | 124            | 8               | 6                | 3                | 1                | 2                | 0                |
| pAzF | pCNF-RS | F                 | 8           | 344            | 57              | 14               | 6                | 8                | 0                | 0                |
| pIF  | pIF-RS  | C2                | 3           | 172            | 6               | 3                | 2                | 1                | 0                | 0                |
| pIF  | pIF-RS  | F                 | 8           | 62             | 0               | 0                | n/a <sup>b</sup> | n/a <sup>b</sup> | n/a <sup>b</sup> | n/a <sup>b</sup> |

<sup>a</sup>Pool names are abbreviated as follows: Tolerant tyrosine (Y), tolerant non-tyrosine (NY), amino-terminal (N), complex 1 (C1), complex 2 (C2), and functional (F) pools.

<sup>b</sup>We only quantitatively assess strains that were sAA-dependent and cannot report all successful TAG incorporations that generated viable or nonviable non-contained clones.

Supplementary Table 4: Conversion of aaRS specificity.

| Residue | TyrRS (WT) | pAcF-RS | pIF-RS | pAzF-RS | pCNF-RS        |
|---------|------------|---------|--------|---------|----------------|
| 32      | Y          | L       | L      | T       | L              |
| 107     | E          | E       | S      | N       | D <sup>a</sup> |
| 108     | F          | F       | F      | F       | W              |
| 109     | Q          | Q       | Q      | Q       | M              |
| 158     | D          | G       | P      | P       | G              |
| 159     | I          | C       | L      | L       | A              |
| 162     | L          | R       | E      | Q       | L              |
| 286     | D          | R       | R      | R       | R              |

<sup>a</sup>The published pCNF-RS contains E107 but we pursued a D107 variant.

**>*Methanocaldococcus jannaschii* TyrRS**

MDEFEMIKRNTSEIIISEEELREVLKKDEKSA**Y**IGFEPGKIHHLGHYLQIKKMIDLQNA  
 GFDIIILLADLHAYLNQKGELEIRKIGDYNKKVFEAMGLKAKYVYGS**EFQ**LDKDYTL  
 NVYRLALKTTLKRARRSMELIAREDENPKVAEVIYPIMQVND**I**H**Y**L**G**VDVAVGGM**E**Q**R**  
 KIHMLARELLPKKVVCIHNPVLTGLDGEGKMSSSKGNFIAVDDSP**E**IRAKIKKAYCP  
 AGVVEGNPIMEIAKYFLEYP**L**TIKRPEKFGGDLTVNSYEELES**L**FKNKELHP**M**DLKNA  
 VAEELIKILEPIRKRL



**Supplementary Table 5: Summary of 22 essential genes containing TAG codons in sAA-dependent strains.**

| Essential gene(s) | GO Annotation<br>(Biological process)                                                                                                                                                                                                                                                                                                                                                                                                          | GO Annotation<br>(Molecular function)                                                                                                                                                                                                                                                                                                                          |
|-------------------|------------------------------------------------------------------------------------------------------------------------------------------------------------------------------------------------------------------------------------------------------------------------------------------------------------------------------------------------------------------------------------------------------------------------------------------------|----------------------------------------------------------------------------------------------------------------------------------------------------------------------------------------------------------------------------------------------------------------------------------------------------------------------------------------------------------------|
| <i>dcx</i>        | GO:0006744 (ubiquinone biosynthetic process)<br>GO:0008615 (pyridoxine biosynthetic process)<br>GO:0009228 (thiamine biosynthetic process)<br>GO:0008152 (metabolic process)<br>GO:0008299 (isoprenoid biosynthetic process)<br>GO:0016114 (terpenoid biosynthetic process)<br>GO:0052865 (1-deoxy-D-xylulose 5-phosphate biosynthetic process)                                                                                                | GO:0008661 (1-deoxy-D-xylulose-5-phosphate synthase activity)<br>GO:0030976 (thiamine pyrophosphate binding)<br>GO:0000287 (magnesium ion binding)<br>GO:0003824 (catalytic activity)<br>GO:0016740 (transferase activity)<br>GO:0046872 (metal ion binding)                                                                                                   |
| <i>ftsI</i>       | GO:0042493 (response to drug)<br>GO:0051301 (cell division)<br>GO:0007049 (cell cycle)<br>GO:0008152 (metabolic process)<br>GO:0008360 (regulation of cell shape)<br>GO:0009252 (peptidoglycan biosynthetic process)<br>GO:0046677 (response to antibiotic)                                                                                                                                                                                    | GO:0005515 (protein binding)<br>GO:0008658 (penicillin binding)<br>GO:0008955 (peptidoglycan glycosyltransferase activity)<br>GO:0003824 (catalytic activity)<br>GO:0016740 (transferase activity)<br>GO:0016757 (transferase activity, transferring glycosyl groups)                                                                                          |
| <i>metK</i>       | GO:0006556 (S-adenosylmethionine biosynthetic process)<br>GO:0006730 (one-carbon metabolic process)                                                                                                                                                                                                                                                                                                                                            | GO:0000287 (magnesium ion binding)<br>GO:0004478 (methionine adenosyltransferase activity)<br>GO:0005515 (protein binding)<br>GO:0030955 (potassium ion binding)<br>GO:0042802 (identical protein binding)<br>GO:0000166 (nucleotide binding)<br>GO:0005524 (ATP binding)<br>GO:0016740 (transferase activity)<br>GO:0046872 (metal ion binding)               |
| <i>murD</i>       | GO:0007049 (cell cycle)<br>GO:0008360 (regulation of cell shape)<br>GO:0009058 (biosynthetic process)<br>GO:0009252 (peptidoglycan biosynthetic process)<br>GO:0051301 (cell division)                                                                                                                                                                                                                                                         | GO:0008764 (UDP-N-acetylmuramoylalanine-D-glutamate ligase activity)<br>GO:0000166 (nucleotide binding)<br>GO:0005524 (ATP binding)<br>GO:0016874 (ligase activity)                                                                                                                                                                                            |
| <i>pgsA</i>       | GO:0006629 (lipid metabolic process)<br>GO:0006655 (phosphatidylglycerol biosynthetic process)<br>GO:0008654 (phospholipid biosynthetic process)                                                                                                                                                                                                                                                                                               | GO:0008444 (CDP-diacylglycerol-glycerol-3-phosphatidyltransferase activity)<br>GO:0016740 (transferase activity)<br>GO:0016780 (phosphotransferase activity, for other substituted phosphate groups)<br>GO:0004089 (carbonate dehydratase activity)                                                                                                            |
| <i>can</i>        | GO:0008152 (metabolic process)<br>GO:0015976 (carbon utilization)                                                                                                                                                                                                                                                                                                                                                                              | GO:0008270 (zinc ion binding)<br>GO:0016829 (lyase activity)<br>GO:0046872 (metal ion binding)                                                                                                                                                                                                                                                                 |
| <i>dnaX</i>       | not found                                                                                                                                                                                                                                                                                                                                                                                                                                      | not found                                                                                                                                                                                                                                                                                                                                                      |
| <i>fabG</i>       | GO:0006633 (fatty acid biosynthetic process)<br>GO:0008610 (lipid biosynthetic process)<br>GO:0009102 (biotin biosynthetic process)<br>GO:0030497 (fatty acid elongation)<br>GO:0006629 (lipid metabolic process)<br>GO:0006631 (fatty acid metabolic process)<br>GO:0008152 (metabolic process)<br>GO:0051114 (oxidation-reduction process)                                                                                                   | GO:0004316 (3-oxoacyl-[acyl-carrier-protein] reductase (NADPH) activity)<br>GO:0042802 (identical protein binding)<br>GO:0050661 (NADP binding)<br>GO:0016491 (oxidoreductase activity)<br>GO:0046872 (metal ion binding)<br>GO:0051536 (iron-sulfur cluster binding)<br>GO:0051538 (3 iron, 4 sulfur cluster binding)                                         |
| <i>ispH</i>       | GO:0006744 (ubiquinone biosynthetic process)<br>GO:0046677 (response to antibiotic)<br>GO:0008299 (isoprenoid biosynthetic process)<br>GO:0016114 (terpenoid biosynthetic process)<br>GO:0019288 (isopentenyl diphosphate biosynthetic process, methylerythritol 4-phosphate pathway)<br>GO:0050992 (dimethylallyl diphosphate biosynthetic process)<br>GO:0051114 (oxidation-reduction process)<br>GO:0010033 (response to organic substance) | GO:0042380 (hydroxymethylbutenyl pyrophosphate reductase activity)<br>GO:0016491 (oxidoreductase activity)<br>GO:0046872 (metal ion binding)<br>GO:0051536 (iron-sulfur cluster binding)<br>GO:0051538 (3 iron, 4 sulfur cluster binding)<br>GO:0051745 (4-hydroxy-3-methylbut-2-en-1-yl diphosphate reductase activity)                                       |
| <i>lptD</i>       | GO:0015920 (lipopolysaccharide transport)<br>GO:0043165 (Gram-negative-bacterium-type cell outer membrane assembly)<br>GO:0061024 (membrane organization)                                                                                                                                                                                                                                                                                      | GO:0005515 (protein binding)                                                                                                                                                                                                                                                                                                                                   |
| <i>lspA</i>       | GO:0006465 (signal peptide processing)<br>GO:0006508 (proteolysis)                                                                                                                                                                                                                                                                                                                                                                             | GO:0008233 (peptidase activity)<br>GO:0004190 (serpin-type endopeptidase activity)<br>GO:0016787 (hydrolase activity)<br>GO:0005515 (protein binding)                                                                                                                                                                                                          |
| <i>pheT</i>       | GO:0006412 (translation)<br>GO:0006432 (phenylalanyl-tRNA aminoacylation)<br>GO:0008033 (tRNA processing)                                                                                                                                                                                                                                                                                                                                      | GO:0000049 (tRNA binding)<br>GO:0000166 (nucleotide binding)<br>GO:0000287 (magnesium ion binding)<br>GO:0003723 (RNA binding)<br>GO:0004812 (aminoacyl-tRNA ligase activity)<br>GO:0004826 (phenylalanine-tRNA ligase activity)<br>GO:0005524 (ATP binding)<br>GO:0016874 (ligase activity)<br>GO:0046872 (metal ion binding)<br>GO:0005515 (protein binding) |
| <i>rpoA</i>       | GO:0006351 (transcription, DNA-templated)                                                                                                                                                                                                                                                                                                                                                                                                      | GO:0008270 (zinc ion binding)<br>GO:0003677 (DNA binding)<br>GO:0003899 (DNA-directed RNA polymerase activity)<br>GO:0016740 (transferase activity)<br>GO:0016779 (nucleotidyltransferase activity)<br>GO:0046983 (protein dimerization activity)                                                                                                              |
| <i>secY</i>       | GO:0006886 (intracellular protein transport)<br>GO:0043952 (protein transport by the Sec complex)<br>GO:0065002 (intracellular protein transmembrane transport)<br>GO:0006605 (protein targeting)<br>GO:0006810 (transport)<br>GO:0015031 (protein transport)                                                                                                                                                                                  | GO:0005515 (protein binding)                                                                                                                                                                                                                                                                                                                                   |
| <i>serS</i>       | GO:0006434 (seryl-tRNA aminoacylation)<br>GO:0016260 (selenocysteine biosynthetic process)<br>GO:0006412 (translation)<br>GO:0006418 (tRNA aminoacylation for protein translation)<br>GO:0097056 (selenocysteinyl-tRNA(Sec) biosynthetic process)                                                                                                                                                                                              | GO:0000287 (magnesium ion binding)<br>GO:0004828 (serine-tRNA ligase activity)<br>GO:0042802 (identical protein binding)<br>GO:0000166 (nucleotide binding)<br>GO:0004812 (aminoacyl-tRNA ligase activity)<br>GO:0005524 (ATP binding)<br>GO:0016874 (ligase activity)                                                                                         |
| <i>topA</i>       | GO:0006265 (DNA topological change)<br>GO:002616 (DNA strand elongation)<br>GO:0006200 (ATP catabolic process)                                                                                                                                                                                                                                                                                                                                 | GO:0003917 (DNA topoisomerase type I activity)<br>GO:0000166 (nucleotide binding)<br>GO:0000287 (magnesium ion binding)<br>GO:0003677 (DNA binding)<br>GO:0003918 (DNA topoisomerase type II (ATP-hydrolyzing) activity)<br>GO:0005524 (ATP binding)<br>GO:0016853 (isomerase activity)<br>GO:0046872 (metal ion binding)<br>GO:0000166 (nucleotide binding)   |
| <i>tyrS</i>       | GO:0006412 (translation)<br>GO:0006418 (tRNA aminoacylation for protein translation)<br>GO:0006437 (tyrosyl-tRNA aminoacylation)                                                                                                                                                                                                                                                                                                               | GO:0003723 (RNA binding)<br>GO:0004812 (aminoacyl-tRNA ligase activity)<br>GO:0004831 (tyrosine-tRNA ligase activity)<br>GO:0005524 (ATP binding)<br>GO:0016874 (ligase activity)                                                                                                                                                                              |

|             |                                                                                                                                                                                                                                                                                                       |                                                                                                                                                                                                                                                                                                                                                                                                                                                                                                                                                                                                                                      |
|-------------|-------------------------------------------------------------------------------------------------------------------------------------------------------------------------------------------------------------------------------------------------------------------------------------------------------|--------------------------------------------------------------------------------------------------------------------------------------------------------------------------------------------------------------------------------------------------------------------------------------------------------------------------------------------------------------------------------------------------------------------------------------------------------------------------------------------------------------------------------------------------------------------------------------------------------------------------------------|
| <i>dnaA</i> | <p>GO:0006260 (DNA replication)<br/> GO:0006275 (regulation of DNA replication)<br/> GO:0006270 (DNA replication initiation)<br/> GO:0006351 (transcription, DNA-templated)<br/> GO:0006355 (regulation of transcription, DNA-templated)<br/> GO:0008156 (negative regulation of DNA replication)</p> | <p>GO:0003677 (DNA binding)<br/> GO:0003688 (DNA replication origin binding)<br/> GO:0005515 (protein binding)<br/> GO:0043565 (sequence-specific DNA binding)<br/> GO:0000166 (nucleotide binding)<br/> GO:0005524 (ATP binding)<br/> GO:0017111 (nucleoside-triphosphatase activity)<br/> GO:0000166 (nucleotide binding)</p>                                                                                                                                                                                                                                                                                                      |
| <i>fusA</i> | <p>GO:0006184 (GTP catabolic process)<br/> GO:0006412 (translation)<br/> GO:0006414 (translational elongation)</p>                                                                                                                                                                                    | <p>GO:0003746 (translation elongation factor activity)<br/> GO:0003924 (GTPase activity)<br/> GO:0005525 (GTP binding)<br/> GO:0000166 (nucleotide binding)</p>                                                                                                                                                                                                                                                                                                                                                                                                                                                                      |
| <i>gylQ</i> | <p>GO:0006412 (translation)<br/> GO:0006426 (glycyl-tRNA aminoacylation)</p>                                                                                                                                                                                                                          | <p>GO:0000166 (nucleotide binding)<br/> GO:0004812 (aminoacyl-tRNA ligase activity)<br/> GO:0004820 (glycine-tRNA ligase activity)<br/> GO:0005524 (ATP binding)<br/> GO:0016874 (ligase activity)</p>                                                                                                                                                                                                                                                                                                                                                                                                                               |
| <i>Int</i>  | <p>GO:0042158 (lipoprotein biosynthetic process)<br/> GO:0006807 (nitrogen compound metabolic process)</p>                                                                                                                                                                                            | <p>GO:0016410 (N-acyltransferase activity)<br/> GO:0016740 (transferase activity)<br/> GO:0016746 (transferase activity, transferring acyl groups)<br/> GO:0016787 (hydrolase activity)</p>                                                                                                                                                                                                                                                                                                                                                                                                                                          |
| <i>murG</i> | <p>GO:0009252 (peptidoglycan biosynthetic process)<br/> GO:0007049 (cell cycle)<br/> GO:0008360 (regulation of cell shape)<br/> GO:0019277 (UDP-N-acetylgalactosamine biosynthetic process)<br/> GO:0030259 (lipid glycosylation)<br/> GO:0051301 (cell division)</p>                                 | <p>GO:0016810 (hydrolase activity, acting on carbon-nitrogen [but not peptide] bonds)<br/> GO:0050511 (undecaprenyl diphosphate-muramoyl pentapeptide-beta-N-acetylglucosaminyl transferase activity)<br/> GO:0016740 (transferase activity)<br/> GO:0016757 (transferase activity, transferring glycosyl groups)<br/> GO:0016758 (transferase activity, transferring hexosyl groups)<br/> GO:0030246 (carbohydrate binding)<br/> GO:0051991 (UDP-N-acetyl-D-glucosamine:N-acetylmuramoyl-L-alanyl-D-glutamyl-meso-2,6-diaminonimetyl-D-alanyl-D-alanine-diphosphoundecaprenol-4-beta-N-acetylglucosaminyl transferase activity)</p> |

**Supplementary Table 6: Summary of escape frequencies and doubling times for 60 sAA-dependent strains.**

| Nickname         | Synthetic amino acid | Essential protein(s) | TAG location(s)       | Escape frequency (EF)<br>(Day 1) | Doubling time (minutes) <sup>a</sup> |                    |
|------------------|----------------------|----------------------|-----------------------|----------------------------------|--------------------------------------|--------------------|
|                  |                      |                      |                       |                                  | 1mM sAA                              | 5mM sAA            |
| rEc.α            | pAcF, α              | n/a                  | n/a                   | n/a                              | 54.25 ± 0.19                         | data not collected |
| DnaX.Y113α       | pAcF, α              | DnaX                 | Y113                  | 6.73E-07 ± 1.89E-07              | 54.51 ± 0.60                         | data not collected |
| DnaX.Y113α'      | pAcF, α              | DnaX                 | Y113                  | 1.95E-07 ± 5.09E-08              | 64.97 ± 0.73                         | data not collected |
| LspA.Y54α        | pAcF, α              | LspA                 | Y54                   | 8.39E-06 ± 1.16E-06              | 52.90 ± 0.11                         | data not collected |
| SecY.Y122α       | pAcF, α              | SecY                 | Y122                  | 2.05E-05 ± 8.38E-06              | 58.90 ± 0.27                         | data not collected |
| SecY.Y309α       | pAcF, α              | SecY                 | Y309                  | 4.97E-04 ± 3.15E-04              | 52.79 ± 0.39                         | data not collected |
| Dxs.αN           | pAcF, α              | Dxs                  | N-term                | 1.85E-06 ± 5.65E-07              | 61.77 ± 0.15                         | data not collected |
| FtsI.αN          | pAcF, α              | FtsI                 | N-term                | 1.07E-05 ± 6.27E-06              | 57.72 ± 0.03                         | data not collected |
| MurD.αN          | pAcF, α              | MurD                 | N-term                | 2.97E-05 ± 2.88E-06              | 55.28 ± 0.41                         | data not collected |
| rEc.α.dB.8       | pAcF, α              | TopA<br>LspA         | Y728<br>Y28           | 6.54E-04 ± 4.45E-04              | 51.47 ± 0.37                         | data not collected |
| rEc.β            | pIF, β               | n/a                  | n/a                   | n/a                              | 60.21 ± 0.46                         | data not collected |
| DnaX.Y113β       | pIF, β               | DnaX                 | Y113                  | 8.71E-07 ± 5.31E-07              | 60.29 ± 0.68                         | data not collected |
| LspA.Y54β        | pIF, β               | LspA                 | Y54                   | 1.86E-05 ± 5.57E-06              | 61.68 ± 1.52                         | data not collected |
| SecY.Y122β       | pIF, β               | SecY                 | Y122                  | 2.62E-06 ± 6.47E-07              | 62.57 ± 0.36                         | data not collected |
| rEc.β.dB.9       | pIF, β               | DnaX<br>LspA         | Y113<br>Y54           | 1.31E-08 ± 9.52E-09              | 59.63 ± 0.29                         | data not collected |
| rEc.β.dB.9'      | pIF, β               | DnaX<br>LspA         | Y113<br>Y54           | 4.92E-09 ± 1.62E-09              | 60.58 ± 0.28                         | data not collected |
| rEc.β.dC.11      | pIF, β               | DnaX<br>LspA<br>Dxs  | Y113<br>Y54<br>N-term | 5.01E-09 ± 3.61E-09              | 61.62 ± 0.19                         | data not collected |
| rEc.β.dC.11'     | pIF, β               | DnaX<br>LspA<br>Dxs  | Y113<br>Y54<br>N-term | 3.31E-09 ± 4.90E-10              | 61.97 ± 0.22                         | data not collected |
| rEc.β.dC.12      | pIF, β               | DnaX<br>LspA<br>SecY | Y113<br>Y54<br>Y122   | 4.68E-09 ± 1.99E-09              | 60.04 ± 0.29                         | data not collected |
| rEc.β.dC.12'     | pIF, β               | DnaX<br>LspA<br>SecY | Y113<br>Y54<br>Y122   | 2.17E-09 ± 3.69E-10              | 61.81 ± 0.65                         | data not collected |
| rEc.β.dC.12'.ΔtY | pIF, β               | DnaX<br>LspA<br>SecY | Y113<br>Y54<br>Y122   | < 4.85E-12                       | 60.99 ± 0.70                         | data not collected |
| rEc.γ            | pAzF, γ              | n/a                  | n/a                   | n/a                              | 58.63 ± 0.87                         | 59.41 ± 0.13       |
| Can.Y83γ         | pAzF, γ              | Can                  | Y83                   | 2.39E-06 ± 7.90E-07              | 57.03 ± 0.27                         | data not collected |
| Can.Y99γ         | pAzF, γ              | Can                  | Y99                   | 1.05E-05 ± 3.84E-06              | 58.34 ± 0.28                         | data not collected |
| DnaX.Y113γ       | pAzF, γ              | DnaX                 | Y113                  | 1.37E-06 ± 2.08E-07              | 58.79 ± 0.36                         | data not collected |
| FabG.Y242γ       | pAzF, γ              | FabG                 | Y242                  | 1.16E-04 ± 6.96E-05              | 57.86 ± 0.14                         | data not collected |
| LptD.Y212γ       | pAzF, γ              | LptD                 | Y212                  | data not collected               | data not collected                   | data not collected |
| LptD.Y354γ       | pAzF, γ              | LptD                 | Y354                  | data not collected               | data not collected                   | data not collected |
| SecY.Y122γ       | pAzF, γ              | SecY                 | Y122                  | 3.38E-06 ± 5.28E-07              | 59.82 ± 0.66                         | data not collected |
| TyrS.Y127γ       | pAzF, γ              | TyrS                 | Y127                  | 2.88E-06 ± 1.75E-06              | 58.45 ± 0.27                         | data not collected |
| Dxs.γN           | pAzF, γ              | Dxs                  | N-term                | 3.41E-06 ± 2.10E-06              | 62.25 ± 0.54                         | data not collected |
| FtsI.γN          | pAzF, γ              | FtsI                 | N-term                | 1.53E-05 ± 1.15E-05              | 58.67 ± 0.13                         | data not collected |
| MurD.γN          | pAzF, γ              | MurD                 | N-term                | 4.24E-05 ± 2.57E-05              | 59.01 ± 0.54                         | data not collected |
| PgsA.γN          | pAzF, γ              | PgsA                 | N-term                | 1.36E-05 ± 3.22E-06              | 68.74 ± 1.34                         | data not collected |
| DnaA.W6γ         | pAzF, γ              | DnaA                 | W6                    | 5.14E-07 ± 1.69E-07              | 65.20 ± 0.89                         | 66.23 ± 0.28       |
| FusA.F32γ        | pAzF, γ              | FusA                 | F32                   | 5.00E-03 ± 4.14E-03              | 73.76 ± 0.17                         | 62.93 ± 0.28       |

|                                   |                |                              |                            |                         |                    |                    |
|-----------------------------------|----------------|------------------------------|----------------------------|-------------------------|--------------------|--------------------|
| GlyQ.Y226 $\gamma$                | pAzF, $\gamma$ | GlyQ                         | Y226                       | 1.01E-05 $\pm$ 3.10E-06 | 65.32 $\pm$ 1.22   | 60.66 $\pm$ 1.19   |
| Lint.Y388 $\gamma$                | pAzF, $\gamma$ | Lint                         | Y388                       | 6.80E-06 $\pm$ 3.19E-06 | 60.98 $\pm$ 0.26   | 62.27 $\pm$ 0.06   |
| MurG.F243 $\gamma$                | pAzF, $\gamma$ | MurG                         | F243                       | 8.05E-07 $\pm$ 4.00E-07 | 59.16 $\pm$ 0.15   | 60.41 $\pm$ 0.52   |
| SerS.F213 $\gamma$                | pAzF, $\gamma$ | SerS                         | F213                       | 1.29E-06 $\pm$ 8.75E-07 | 58.68 $\pm$ 0.19   | 59.52 $\pm$ 0.36   |
| rEc. $\gamma$ .dB.16              | pAzF, $\gamma$ | PgsA<br>MetK                 | N-term                     | 9.87E-07 $\pm$ 4.24E-07 | 61.51 $\pm$ 1.02   | data not collected |
| rEc. $\gamma$ .dB.17              | pAzF, $\gamma$ | SecY                         | Y122<br>Y309               | 1.77E-06 $\pm$ 1.14E-06 | 64.02 $\pm$ 1.13   | data not collected |
| rEc. $\gamma$ .dC.18              | pAzF, $\gamma$ | TopA<br>SecY122<br>Dxs       | Y728<br>Y122<br>N-term     | 3.38E-05 $\pm$ 2.65E-05 | 61.15 $\pm$ 0.88   | data not collected |
| rEc. $\gamma$ .dD.20              | pAzF, $\gamma$ | LspA<br>LspA<br>PheT<br>IspH | Y28<br>Y50<br>Y615<br>Y142 | 1.02E-05 $\pm$ 5.70E-06 | 62.61 $\pm$ 0.32   | data not collected |
| rEc. $\gamma$ .dB.22              | pAzF, $\gamma$ | SecY<br>PheT                 | Y309<br>Y615               | 2.93E-05 $\pm$ 1.53E-05 | 59.97 $\pm$ 0.57   | data not collected |
| rEc. $\gamma$ .dB.23              | pAzF, $\gamma$ | PheT                         | Y558<br>Y601               | 5.48E-06 $\pm$ 3.73E-06 | 58.22 $\pm$ 0.30   | data not collected |
| rEc. $\gamma$ .dC.24              | pAzF, $\gamma$ | TopA<br>LspA<br>Dxs          | Y728<br>Y28<br>N-term      | 2.85E-06 $\pm$ 2.10E-06 | 62.12 $\pm$ 0.83   | data not collected |
| rEc. $\gamma$ .dB.26              | pAzF, $\gamma$ | DnaX                         | Y113<br>Y328               | 1.42E-07 $\pm$ 8.69E-08 | 60.49 $\pm$ 0.15   | data not collected |
| rEc. $\gamma$ .dB.28              | pAzF, $\gamma$ | LptD                         | Y212<br>Y354               | data not collected      | data not collected | data not collected |
| rEc. $\gamma$ .dB.29              | pAzF, $\gamma$ | LptD                         | Y458<br>Y514               | data not collected      | data not collected | data not collected |
| rEc. $\gamma$ .dB.31              | pAzF, $\gamma$ | LptD                         | Y212<br>Y244               | data not collected      | data not collected | data not collected |
| rEc. $\gamma$ .dB.38              | pAzF, $\gamma$ | FusA<br>RpoA                 | F32<br>Y152                | data not collected      | data not collected | data not collected |
| rEc. $\gamma$ .dB.39              | pAzF, $\gamma$ | FusA<br>MurG                 | F32<br>F243                | data not collected      | data not collected | data not collected |
| rEc. $\gamma$ .dB.40              | pAzF, $\gamma$ | DnaA<br>GlyQ                 | W6<br>Y226                 | data not collected      | data not collected | data not collected |
| rEc. $\gamma$ .dB.41              | pAzF, $\gamma$ | DnaA<br>MurG                 | W6<br>F243                 | 1.56E-09 $\pm$ 1.02E-09 | 63.78 $\pm$ 0.26   | 62.62 $\pm$ 0.04   |
| rEc. $\gamma$ .dB.41'             | pAzF, $\gamma$ | DnaA<br>MurG                 | W6<br>F243                 | 5.98E-10                | 62.22 $\pm$ 0.31   | 60.90 $\pm$ 0.21   |
| rEc. $\gamma$ .dB.42              | pAzF, $\gamma$ | DnaA<br>FusA                 | W6<br>F32                  | data not collected      | data not collected | data not collected |
| rEc. $\gamma$ .dB.43              | pAzF, $\gamma$ | DnaA<br>SerS                 | W6<br>F213                 | 2.32E-09 $\pm$ 6.53E-10 | 75.89 $\pm$ 2.79   | 59.85 $\pm$ 0.10   |
| rEc. $\gamma$ .dB.44              | pAzF, $\gamma$ | DnaA<br>RpoA                 | W6<br>Y152                 | data not collected      | data not collected | data not collected |
| rEc. $\gamma$ .dB.45              | pAzF, $\gamma$ | Lint<br>MurG                 | Y388<br>F243               | data not collected      | data not collected | data not collected |
| rEc. $\gamma$ .dC.46              | pAzF, $\gamma$ | DnaA<br>MurG<br>SerS         | W6<br>F243<br>F213         | < 7.88E-11              | 71.01 $\pm$ 0.36   | 63.42 $\pm$ 0.30   |
| rEc. $\gamma$ .dC.46'             | pAzF, $\gamma$ | DnaA<br>MurG<br>SerS         | W6<br>F243<br>F213         | < 4.36E-11              | 71.86 $\pm$ 0.59   | 64.27 $\pm$ 0.23   |
| rEc. $\gamma$ .dC.46' $\Delta$ tY | pAzF, $\gamma$ | DnaA<br>MurG<br>SerS         | W6<br>F243<br>F213         | < 6.3E-12               | 64.91 $\pm$ 0.39   | 61.41 $\pm$ 0.18   |

<sup>a</sup>Average doubling times are shown for growth in permissive media; n=3 technical replicates; error is  $\pm$ s.d.

**Supplementary Table 7: Escape mechanisms of MutS-deficient strains with one essential TAG codon.**

| Escape mutant          | Essential gene | Causative SNP <sup>a</sup> | Causative SNP location <sup>b</sup> | Relative fitness in media without sAA <sup>c</sup> |
|------------------------|----------------|----------------------------|-------------------------------------|----------------------------------------------------|
| SecY.Y122 $\alpha$ .E1 | <i>secY</i>    | cag→cGg                    | RpsD.Q54R                           | 0.68 ± 0.035                                       |
| SecY.Y122 $\alpha$ .E2 | <i>secY</i>    | tag→Cag                    | SecY. $\alpha$ 122Q                 | 0.97 ± 0.006                                       |
| SecY.Y122 $\alpha$ .E3 | <i>secY</i>    | ctg→ctA                    | <i>glnV</i> → <i>supE</i>           | 1.00 ± 0.028                                       |
| DnaX.Y113 $\alpha$ .E1 | <i>dnaX</i>    | tag→tGg                    | DnaX. $\alpha$ 113W                 | 0.97 ± 0.011                                       |
| DnaX.Y113 $\alpha$ .E2 | <i>dnaX</i>    | tag→tGg                    | DnaX. $\alpha$ 113W                 | 0.95 ± 0.015                                       |
| DnaX.Y113 $\alpha$ .E3 | <i>dnaX</i>    | tag→tGg                    | DnaX. $\alpha$ 113W                 | 0.94 ± 0.014                                       |

<sup>a</sup>Causative SNP is capitalized within the codon or anticodon sequence, from 5' to 3', for protein and tRNA-encoded genes, respectively.

<sup>b</sup>Location of the amino acid change is shown for protein-encoded genes and names conferred by anticodon mutations for tRNA-encoded genes.

<sup>c</sup>Average ratio of doubling times are shown for contained ancestor to escape mutant grown in permissive and nonpermissive media, respectively; n=3 technical replicates; error is  $\pm$ s.d.

**Supplementary Table 8: Whole genome sequencing of MutS-deficient strains with one essential TAG codon.**

| Strain        | Feature | Start   | End     | WT  | Mut         | Gene             | Consequence                                     | AA change | Product                                                                                             | GO Annotation (Biological process)                                                                                                                                                                                                                                                                                                                                                                                                                                                                                                                                                                                                                  |
|---------------|---------|---------|---------|-----|-------------|------------------|-------------------------------------------------|-----------|-----------------------------------------------------------------------------------------------------|-----------------------------------------------------------------------------------------------------------------------------------------------------------------------------------------------------------------------------------------------------------------------------------------------------------------------------------------------------------------------------------------------------------------------------------------------------------------------------------------------------------------------------------------------------------------------------------------------------------------------------------------------------|
| DnaX.Y113a.E1 | indel   | 2       | 2       | -   | TCA         | <i>thrL</i>      | UPSTREAM (+188)                                 | -         | the operon leader peptide                                                                           | GO:008652 (cellular amino acid biosynthetic process)<br>GO:009088 (threonine biosynthetic process)<br>GO:001555 (transcriptional attenuation)<br>GO:001556 (transcriptional attenuation by ribosome)                                                                                                                                                                                                                                                                                                                                                                                                                                                |
| DnaX.Y113a.E1 | snp     | 491478  | 491478  | A   | G           | <i>dnaX</i>      | NON_SYNONYMOUS_CODING                           | αW        | DNA polymerase III/DNA elongation factor III, τ and γ subunits                                      | GO:0006200 (ATP catabolic process)<br>GO:0006260 (DNA replication)<br>GO:0008555 (drug transmembrane transport)<br>GO:0030641 (regulation of cellular pH)<br>GO:0046677 (response to antibiotic)<br>GO:0055085 (transmembrane transport)<br>GO:0006810 (transport)                                                                                                                                                                                                                                                                                                                                                                                  |
| DnaX.Y113a.E1 | snp     | 890780  | 890780  | T   | G           | <i>mdfA</i>      | START_REMOVED                                   | M*        | multidrug efflux system protein                                                                     | GO:0008555 (drug transmembrane transport)<br>GO:0030641 (regulation of cellular pH)<br>GO:0046677 (response to antibiotic)<br>GO:0055085 (transmembrane transport)<br>GO:0006810 (transport)                                                                                                                                                                                                                                                                                                                                                                                                                                                        |
| DnaX.Y113a.E1 | snp     | 890782  | 890782  | C   | T           | <i>mdfA</i>      | STOP_GAINED                                     | Q*        | multidrug efflux system protein                                                                     | GO:0008555 (drug transmembrane transport)<br>GO:0030641 (regulation of cellular pH)<br>GO:0046677 (response to antibiotic)<br>GO:0055085 (transmembrane transport)<br>GO:0006810 (transport)                                                                                                                                                                                                                                                                                                                                                                                                                                                        |
| DnaX.Y113a.E1 | snp     | 892572  | 892572  | C   | T           | <i>yhlJ</i>      | NON_SYNONYMOUS_CODING                           | M1        | FMN and erythrose-4-P phosphatase                                                                   | GO:0016311 (dephosphorylation)<br>GO:0023663 (FMN catabolic process)<br>GO:0008152 (metabolic process)<br>GO:0006810 (transport)                                                                                                                                                                                                                                                                                                                                                                                                                                                                                                                    |
| DnaX.Y113a.E1 | snp     | 1052407 | 1052407 | C   | T           | <i>glcE</i>      | SYNONYMOUS_CODING                               | A         | lipoprotein required for formation of O-antigen capsule, predicted exopolysaccharide export protein | GO:0006810 (transport)<br>GO:0006811 (ion transport)<br>GO:0015774 (polysaccharide transport)<br>GO:0006810 (transport)                                                                                                                                                                                                                                                                                                                                                                                                                                                                                                                             |
| DnaX.Y113a.E1 | snp     | 1214889 | 1214889 | C   | G           | <i>stfP</i>      | NON_SYNONYMOUS_CODING                           | L/V       | uncharacterized protein from lambdaoid prophage e14 region                                          | Not found                                                                                                                                                                                                                                                                                                                                                                                                                                                                                                                                                                                                                                           |
| DnaX.Y113a.E1 | snp     | 1639395 | 1639395 | C   | T           | <i>ffaQ_ydD</i>  | NON_SYNONYMOUS_CODING,<br>NON_SYNONYMOUS_CODING | P, G/R    | Qin prophage; predicted tail fiber assembly protein (TfaQ), predicted transporter (YdD)             | Not found<br>ydlD<br>GO:0006813 (potassium ion transport)<br>GO:0006810 (transport)<br>GO:0005508 (transmembrane transport)<br>GO:0005514 (oxidation-reduction process)                                                                                                                                                                                                                                                                                                                                                                                                                                                                             |
| DnaX.Y113a.E1 | snp     | 2043895 | 2043895 | A   | G           | <i>yeoY</i>      | NON_SYNONYMOUS_CODING                           | D/G       | membrane-anchored, periplasmic TMAO, DMSO reductase                                                 | GO:0006810 (transport)                                                                                                                                                                                                                                                                                                                                                                                                                                                                                                                                                                                                                              |
| DnaX.Y113a.E1 | indel   | 2769807 | 2769807 | G   | GC          | <i>yfM</i>       | UPSTREAM (+11)                                  | -         | CP4-57 prophage, predicted protein                                                                  | Not found                                                                                                                                                                                                                                                                                                                                                                                                                                                                                                                                                                                                                                           |
| DnaX.Y113a.E1 | snp     | 4603891 | 4603891 | C   | T           | <i>yjB</i>       | SYNONYMOUS_CODING                               | A         | conserved inner membrane protein                                                                    | Not found                                                                                                                                                                                                                                                                                                                                                                                                                                                                                                                                                                                                                                           |
| DnaX.Y113a.E1 | snp     | 4643550 | 4643553 | TTT | CAG         | <i>thrL</i>      | UPSTREAM (+194)                                 | -         | the operon leader peptide                                                                           | GO:008652 (cellular amino acid biosynthetic process)<br>GO:009088 (threonine biosynthetic process)<br>GO:001555 (transcriptional attenuation)<br>GO:001556 (transcriptional attenuation by ribosome)                                                                                                                                                                                                                                                                                                                                                                                                                                                |
| DnaX.Y113a.E2 | indel   | 3       | 3       | CT  | TATTTTCAGCT | <i>thrL</i>      | UPSTREAM (+187)                                 | -         | the operon leader peptide                                                                           | GO:008652 (cellular amino acid biosynthetic process)<br>GO:009088 (threonine biosynthetic process)<br>GO:001555 (transcriptional attenuation)<br>GO:001556 (transcriptional attenuation by ribosome)                                                                                                                                                                                                                                                                                                                                                                                                                                                |
| DnaX.Y113a.E2 | snp     | 491478  | 491478  | A   | G           | <i>dnaX</i>      | NON_SYNONYMOUS_CODING                           | αW        | DNA polymerase III/DNA elongation factor III, τ and γ subunits                                      | GO:0006200 (ATP catabolic process)<br>GO:0006260 (DNA replication)<br>GO:0016311 (dephosphorylation)<br>GO:0023663 (FMN catabolic process)<br>GO:0008152 (metabolic process)                                                                                                                                                                                                                                                                                                                                                                                                                                                                        |
| DnaX.Y113a.E2 | snp     | 892572  | 892572  | C   | T           | <i>yhlJ</i>      | NON_SYNONYMOUS_CODING                           | M1        | FMN and erythrose-4-P phosphatase                                                                   | GO:0016311 (dephosphorylation)<br>GO:0023663 (FMN catabolic process)<br>GO:0008152 (metabolic process)                                                                                                                                                                                                                                                                                                                                                                                                                                                                                                                                              |
| DnaX.Y113a.E2 | snp     | 1214889 | 1214889 | C   | G           | <i>stfP</i>      | NON_SYNONYMOUS_CODING                           | L/V       | uncharacterized protein from lambdaoid prophage e14 region                                          | Not found                                                                                                                                                                                                                                                                                                                                                                                                                                                                                                                                                                                                                                           |
| DnaX.Y113a.E2 | snp     | 1216718 | 1216718 | C   | G           | <i>stfE</i>      | WITHIN_NON_CODING_GENE                          | -         | pseudogene                                                                                          | GO:0019048 (modulation by virus of host morphology or physiology)<br>GO:0046718 (viral entry into host cell)<br>GO:0019062 (viral attachment to host cell)                                                                                                                                                                                                                                                                                                                                                                                                                                                                                          |
| DnaX.Y113a.E2 | indel   | 2769807 | 2769807 | G   | GC          | <i>yfM</i>       | UPSTREAM (+11)                                  | -         | CP4-57 prophage, predicted protein                                                                  | Not found                                                                                                                                                                                                                                                                                                                                                                                                                                                                                                                                                                                                                                           |
| DnaX.Y113a.E2 | snp     | 3074740 | 3074740 | A   | G           | <i>pgk</i>       | SYNONYMOUS_CODING                               | R         | phosphoglycerate kinase                                                                             | GO:0000796 (glycolysis)<br>GO:0016310 (phosphorylation)<br>GO:0008152 (metabolic process)<br>GO:0045918 (negative regulation of cytolysis)<br>GO:0009252 (peptidoglycan biosynthetic process)<br>GO:0008360 (regulation of cell shape)<br>GO:0046677 (response to antibiotic)                                                                                                                                                                                                                                                                                                                                                                       |
| DnaX.Y113a.E2 | snp     | 3524039 | 3524039 | G   | A           | <i>mrcA</i>      | SYNONYMOUS_CODING                               | E         | fused penicillin-binding protein 1a: murein transglycosylase/murein transpeptidase                  | Not found                                                                                                                                                                                                                                                                                                                                                                                                                                                                                                                                                                                                                                           |
| DnaX.Y113a.E2 | snp     | 4603891 | 4603891 | C   | T           | <i>yjB</i>       | SYNONYMOUS_CODING                               | A         | conserved inner membrane protein                                                                    | Not found                                                                                                                                                                                                                                                                                                                                                                                                                                                                                                                                                                                                                                           |
| DnaX.Y113a.E3 | indel   | 2       | 2       | GC  | TATTTTCAGC  | <i>thrL</i>      | UPSTREAM (+188)                                 | -         | the operon leader peptide                                                                           | GO:008652 (cellular amino acid biosynthetic process)<br>GO:009088 (threonine biosynthetic process)<br>GO:001555 (transcriptional attenuation)<br>GO:001556 (transcriptional attenuation by ribosome)                                                                                                                                                                                                                                                                                                                                                                                                                                                |
| DnaX.Y113a.E3 | snp     | 491478  | 491478  | A   | G           | <i>dnaX</i>      | NON_SYNONYMOUS_CODING                           | αW        | DNA polymerase III/DNA elongation factor III, τ and γ subunits                                      | GO:0006200 (ATP catabolic process)<br>GO:0006260 (DNA replication)<br>GO:0016311 (dephosphorylation)<br>GO:0023663 (FMN catabolic process)<br>GO:0008152 (metabolic process)                                                                                                                                                                                                                                                                                                                                                                                                                                                                        |
| DnaX.Y113a.E3 | snp     | 892572  | 892572  | C   | T           | <i>yhlJ</i>      | NON_SYNONYMOUS_CODING                           | M1        | FMN and erythrose-4-P phosphatase                                                                   | GO:0016311 (dephosphorylation)<br>GO:0023663 (FMN catabolic process)<br>GO:0008152 (metabolic process)                                                                                                                                                                                                                                                                                                                                                                                                                                                                                                                                              |
| DnaX.Y113a.E3 | snp     | 1214889 | 1214889 | C   | G           | <i>stfP</i>      | NON_SYNONYMOUS_CODING                           | L/V       | uncharacterized protein from lambdaoid prophage e14 region                                          | Not found                                                                                                                                                                                                                                                                                                                                                                                                                                                                                                                                                                                                                                           |
| DnaX.Y113a.E3 | snp     | 1961000 | 1961000 | G   | A           | <i>tarZ</i>      | SYNONYMOUS_CODING                               | G         | trimethylamine N-oxide reductase system III, catalytic subunit                                      | GO:0045333 (cellular respiration)<br>GO:0005114 (oxidation-reduction process)<br>GO:0006635 (fatty acid beta-oxidation)<br>GO:0006631 (fatty acid metabolic process)<br>GO:0016042 (lipid catabolic process)<br>GO:0006429 (lipid metabolic process)<br>GO:0008152 (metabolic process)<br>GO:0055114 (oxidation-reduction process)                                                                                                                                                                                                                                                                                                                  |
| DnaX.Y113a.E3 | snp     | 2461771 | 2461771 | G   | A           | <i>fadL</i>      | NON_SYNONYMOUS_CODING                           | T1        | fused enoyl-CoA hydratase and epimerase and isomerase/3-hydroxyacyl-CoA dehydrogenase               | GO:0042773 (ATP synthesis coupled electron transport)<br>GO:0055114 (oxidation-reduction process)                                                                                                                                                                                                                                                                                                                                                                                                                                                                                                                                                   |
| DnaX.Y113a.E3 | snp     | 2609236 | 2609236 | T   | C           | <i>hydD</i>      | NON_SYNONYMOUS_CODING                           | L/P       | hydrogenase 4, membrane subunit                                                                     | Not found                                                                                                                                                                                                                                                                                                                                                                                                                                                                                                                                                                                                                                           |
| DnaX.Y113a.E3 | indel   | 2769807 | 2769807 | G   | GC          | <i>yfM</i>       | UPSTREAM (+11)                                  | -         | CP4-57 prophage, predicted protein                                                                  | Not found                                                                                                                                                                                                                                                                                                                                                                                                                                                                                                                                                                                                                                           |
| DnaX.Y113a.E3 | snp     | 4464463 | 4464463 | C   | T           | <i>mrdD</i>      | NON_SYNONYMOUS_CODING                           | A/T       | anaerobic ribonucleoside-triphosphate reductase                                                     | GO:0006260 (DNA replication)<br>GO:0008152 (metabolic process)<br>GO:0015949 (nucleoside-containing small molecule interconversion)<br>GO:0055114 (oxidation-reduction process)                                                                                                                                                                                                                                                                                                                                                                                                                                                                     |
| DnaX.Y113a.E3 | snp     | 4603891 | 4603891 | C   | T           | <i>yjB</i>       | SYNONYMOUS_CODING                               | A         | conserved inner membrane protein                                                                    | Not found                                                                                                                                                                                                                                                                                                                                                                                                                                                                                                                                                                                                                                           |
| SeeY.Y122a.E1 | snp     | 270639  | 270639  | T   | C           | <i>insN_insI</i> | NON_SYNONYMOUS_CODING,<br>SYNONYMOUS_CODING     | Y/H, N    | pseudogene (InsN), IS30 transposase (InsI)                                                          | Not found<br>insN<br>GO:0006310 (DNA recombination)<br>GO:0006313 (transposition, DNA-mediated)<br>GO:0032196 (transposition)<br>insI<br>GO:0006316 (transposition, DNA-mediated)<br>GO:0006310 (DNA recombination)<br>GO:0019074 (DNA integration)<br>GO:0032196 (transposition)<br>GO:0005978 (copper ion homeostasis)<br>GO:0010273 (detoxification of copper ion)<br>GO:0046688 (response to copper ion)<br>GO:0010272 (response to silver ion)<br>GO:0010043 (response to zinc ion)                                                                                                                                                            |
| SeeY.Y122a.E1 | snp     | 596378  | 596378  | C   | T           | <i>catF</i>      | NON_SYNONYMOUS_CODING                           | P/L       | periplasmic copper- and silver-binding protein                                                      | GO:0005978 (copper ion homeostasis)<br>GO:0010273 (detoxification of copper ion)<br>GO:0046688 (response to copper ion)<br>GO:0010272 (response to silver ion)<br>GO:0010043 (response to zinc ion)                                                                                                                                                                                                                                                                                                                                                                                                                                                 |
| SeeY.Y122a.E1 | indel   | 732441  | 732441  | -   | G           | <i>rhcC</i>      | FRAMESHIFT_CODING                               | -         | rhcC element core protein RhcC                                                                      | Not found                                                                                                                                                                                                                                                                                                                                                                                                                                                                                                                                                                                                                                           |
| SeeY.Y122a.E1 | snp     | 945441  | 945441  | G   | A           | <i>rarA</i>      | NON_SYNONYMOUS_CODING                           | V/I       | DNA-dependent ATPase involved in processing recombination intermediates at replication forks        | GO:0006310 (DNA recombination)<br>GO:0006261 (DNA-dependent DNA replication)                                                                                                                                                                                                                                                                                                                                                                                                                                                                                                                                                                        |
| SeeY.Y122a.E1 | snp     | 961133  | 961133  | G   | A           | <i>foxA</i>      | SYNONYMOUS_CODING                               | L         | formate channel                                                                                     | GO:0015724 (formate transport)<br>GO:0006810 (transport)                                                                                                                                                                                                                                                                                                                                                                                                                                                                                                                                                                                            |
| SeeY.Y122a.E1 | snp     | 2139525 | 2139525 | G   | A           | <i>wcc</i>       | NON_SYNONYMOUS_CODING                           | P/S       | protein-tyrosine kinase                                                                             | GO:0005222 (capsule polysaccharide biosynthetic process)<br>GO:0009242 (sulfonic acid biosynthetic process)<br>GO:0009103 (lipopolysaccharide biosynthetic process)<br>GO:0038083 (peptidyl-tyrosine autophosphorylation)<br>GO:0018108 (peptidyl-tyrosine phosphorylation)<br>GO:0016310 (phosphorylation)<br>GO:0000271 (polysaccharide biosynthetic process)<br>GO:0050790 (regulation of catalytic activity)<br>GO:0005334 (amino acid transmembrane transport)<br>GO:0006865 (amino acid transport)<br>GO:0006835 (dicarboxylic acid transport)<br>GO:0032329 (serine transport)<br>GO:0015826 (threonine transport)<br>GO:0006810 (transport) |
| SeeY.Y122a.E1 | indel   | 3241660 | 3241660 | G   | -           | <i>satT</i>      | FRAMESHIFT_CODING                               | -         | pseudogene                                                                                          | GO:0008299 (isoprenoid biosynthetic process)<br>GO:0045828 (positive regulation of isoprenoid metabolic process)                                                                                                                                                                                                                                                                                                                                                                                                                                                                                                                                    |
| SeeY.Y122a.E1 | snp     | 3350931 | 3350931 | C   | T           | <i>edbB</i>      | NON_SYNONYMOUS_CODING                           | R/H       | isoprenoid biosynthesis protein with amidotransferase-like domain                                   | GO:0008299 (isoprenoid biosynthetic process)<br>GO:0045828 (positive regulation of isoprenoid metabolic process)                                                                                                                                                                                                                                                                                                                                                                                                                                                                                                                                    |

|             |       |         |         |   |   |                   |                                             |        |                                                                                                               |                                                                                                                                                                                                                                                                                                                                                                                                                           |
|-------------|-------|---------|---------|---|---|-------------------|---------------------------------------------|--------|---------------------------------------------------------------------------------------------------------------|---------------------------------------------------------------------------------------------------------------------------------------------------------------------------------------------------------------------------------------------------------------------------------------------------------------------------------------------------------------------------------------------------------------------------|
| SecY122a.E1 | snp   | 3442201 | 3442201 | T | C | <i>rpsD</i>       | NON_SYNONYMOUS_CODING                       | Q/R    | 30S ribosomal subunit protein S4                                                                              | GO:0006353 (DNA-dependent transcription, termination)<br>GO:004947 (negative regulation of translational initiation)<br>GO:0006355 (regulation of transcription, DNA-dependent)<br>GO:0006117 (regulation of translation)<br>GO:0046677 (response to antibiotic)<br>GO:001564 (transcription anti-termination)<br>GO:0006351 (transcription, DNA-templated)<br>GO:0006112 (translation)                                   |
| SecY122a.E2 | snp   | 270639  | 270639  | T | C | <i>insN, insI</i> | NON_SYNONYMOUS_CODING,<br>SYNONYMOUS_CODING | V/H, N | pseudogene (InsN), IS30 transposase (InsI)                                                                    | insN:<br>GO:0006310 (DNA recombination)<br>GO:0006313 (transposition, DNA-mediated)<br>GO:0032196 (transposition)<br>insI:<br>GO:0006316 (transposition, DNA-mediated)<br>GO:0006310 (DNA recombination)<br>GO:0015074 (DNA integration)<br>GO:0032196 (transposition)                                                                                                                                                    |
| SecY122a.E2 | snp   | 425116  | 425116  | C | T | <i>queA</i>       | NON_SYNONYMOUS_CODING                       | R/C    | S-adenosylmethionine: tRNA ribosyltransferase-isomerase                                                       | GO:0008616 (quasione biosynthetic process)<br>GO:0002999 (RNA wobble guanine modification)                                                                                                                                                                                                                                                                                                                                |
| SecY122a.E2 | snp   | 647801  | 647801  | G | A | <i>citF</i>       | SYNONYMOUS_CODING                           | S      | citrate lyase, citrate-ACP transferase (a) subunit                                                            | GO:0006884 (acetyl-CoA metabolic process)                                                                                                                                                                                                                                                                                                                                                                                 |
| SecY122a.E2 | snp   | 945441  | 945441  | G | A | <i>rarA</i>       | NON_SYNONYMOUS_CODING                       | V/I    | DNA-dependent ATPase involved in processing recombination intermediates at replication forks                  | GO:0006310 (DNA recombination)<br>GO:0006261 (DNA-dependent DNA replication)                                                                                                                                                                                                                                                                                                                                              |
| SecY122a.E2 | snp   | 961133  | 961133  | G | A | <i>focA</i>       | SYNONYMOUS_CODING                           | L      | formate channel                                                                                               | GO:0015724 (formate transport)<br>GO:0006810 (transport)                                                                                                                                                                                                                                                                                                                                                                  |
| SecY122a.E2 | snp   | 2139525 | 2139525 | G | A | <i>wzc</i>        | NON_SYNONYMOUS_CODING                       | P/S    | protein-tyrosine kinase                                                                                       | GO:0045227 (capsaicin polysaccharide biosynthetic process)<br>GO:0009242 (colanic acid biosynthetic process)<br>GO:0009103 (heparan sulfate biosynthetic process)<br>GO:0038083 (peptidyl-tyrosine autophosphorylation)<br>GO:0018108 (peptidyl-tyrosine phosphorylation)<br>GO:0016310 (phosphorylation)<br>GO:0002711 (polysaccharide biosynthetic process)<br>GO:0007900 (regulation of catalytic activity)            |
| SecY122a.E2 | indel | 2466909 | 2466909 | - | C | <i>yfiP</i>       | UPSTREAM (+131)                             | -      | predicted protein                                                                                             | Not found                                                                                                                                                                                                                                                                                                                                                                                                                 |
| SecY122a.E2 | indel | 3241660 | 3241660 | G | - | <i>sstI</i>       | FRAMESHIFT_CODING                           | -      | pseudogene                                                                                                    | GO:0003333 (amino acid transmembrane transport)<br>GO:0006865 (amino acid transport)<br>GO:0006835 (dicarboxylic acid transport)<br>GO:0013229 (serine transport)<br>GO:0015826 (threonine transport)                                                                                                                                                                                                                     |
| SecY122a.E2 | snp   | 3444418 | 3444418 | A | G | <i>secY</i>       | NON_SYNONYMOUS_CODING                       | o/Q    | preprotein translocase membrane subunit                                                                       | GO:0006810 (transport)<br>GO:0005002 (intracellular protein transmembrane transport)<br>GO:0006886 (intracellular protein transport)<br>GO:0006605 (protein targeting)<br>GO:0015031 (protein transport)<br>GO:0043952 (protein transport by the Sec complex)<br>GO:0006810 (transport)                                                                                                                                   |
| SecY122a.E3 | snp   | 158987  | 158987  | C | T | <i>penB</i>       | UPSTREAM (+30)                              | -      | poly(A) polymerase                                                                                            | GO:0006378 (mRNA polyadenylation)<br>GO:0006397 (mRNA processing)<br>GO:0006276 (plasmid maintenance)<br>GO:0009451 (RNA modification)<br>GO:0006396 (RNA processing)<br>GO:0006351 (transcription, DNA-templated)                                                                                                                                                                                                        |
| SecY122a.E3 | snp   | 270639  | 270639  | T | C | <i>insN, insI</i> | NON_SYNONYMOUS_CODING,<br>SYNONYMOUS_CODING | V/H, N | pseudogene (InsN), IS30 transposase (InsI)                                                                    | insN:<br>GO:0006310 (DNA recombination)<br>GO:0006313 (transposition, DNA-mediated)<br>GO:0032196 (transposition)<br>insI:<br>GO:0006316 (transposition, DNA-mediated)<br>GO:0006310 (DNA recombination)<br>GO:0015074 (DNA integration)<br>GO:0032196 (transposition)                                                                                                                                                    |
| SecY122a.E3 | snp   | 695629  | 695629  | C | T | <i>glnI</i>       | NON_SYNONYMOUS_CODING                       | n/a    | tRNA-Gln                                                                                                      | Not found                                                                                                                                                                                                                                                                                                                                                                                                                 |
| SecY122a.E3 | snp   | 945441  | 945441  | G | A | <i>rarA</i>       | NON_SYNONYMOUS_CODING                       | V/I    | DNA-dependent ATPase involved in processing recombination intermediates at replication forks                  | GO:0006310 (DNA recombination)<br>GO:0006261 (DNA-dependent DNA replication)                                                                                                                                                                                                                                                                                                                                              |
| SecY122a.E3 | snp   | 961133  | 961133  | G | A | <i>focA</i>       | SYNONYMOUS_CODING                           | L      | formate channel                                                                                               | GO:0015724 (formate transport)<br>GO:0006810 (transport)                                                                                                                                                                                                                                                                                                                                                                  |
| SecY122a.E3 | snp   | 1082918 | 1082918 | C | T | <i>putA</i>       | SYNONYMOUS_CODING                           | P      | fixed PutA DNA-binding transcriptional repressor/proline dehydrogenase-1-pyruvate-5-carboxylate dehydrogenase | GO:0006537 (glutamate biosynthetic process)<br>GO:0008152 (metabolic process)<br>GO:0055114 (oxidation-reduction process)<br>GO:0006561 (proline biosynthetic process)<br>GO:0006562 (proline catabolic process)<br>GO:0010133 (proline catabolic process to glutamate)<br>GO:0006560 (proline metabolic process)<br>GO:0006355 (regulation of transcription, DNA-dependent)<br>GO:0006351 (transcription, DNA-templated) |
| SecY122a.E3 | snp   | 1656103 | 1656103 | G | A | <i>yjJ, insD</i>  | SYNONYMOUS_CODING,<br>SYNONYMOUS_CODING     | F, P   | predicted transporter, IS2 element protein                                                                    | yjJ:<br>GO:0006813 (potassium ion transport)<br>GO:0006810 (transport)<br>insD:<br>GO:0055085 (transmembrane transport)<br>GO:0006310 (DNA recombination)<br>GO:0015074 (DNA integration)<br>GO:0032196 (transposition)                                                                                                                                                                                                   |
| SecY122a.E3 | snp   | 2139525 | 2139525 | G | A | <i>wzc</i>        | NON_SYNONYMOUS_CODING                       | P/S    | protein-tyrosine kinase                                                                                       | GO:0045227 (capsaicin polysaccharide biosynthetic process)<br>GO:0009242 (colanic acid biosynthetic process)<br>GO:0009103 (heparan sulfate biosynthetic process)<br>GO:0038083 (peptidyl-tyrosine autophosphorylation)<br>GO:0018108 (peptidyl-tyrosine phosphorylation)<br>GO:0016310 (phosphorylation)<br>GO:0002711 (polysaccharide biosynthetic process)<br>GO:0007900 (regulation of catalytic activity)            |
| SecY122a.E3 | snp   | 2886400 | 2886400 | C | T | <i>casA</i>       | NON_SYNONYMOUS_CODING                       | G/R    | CRISPR RNA containing Cascade antiviral complex protein                                                       | GO:0007900 (regulation of catalytic activity)                                                                                                                                                                                                                                                                                                                                                                             |
| SecY122a.E3 | snp   | 3181496 | 3181496 | A | G | <i>ygcC</i>       | NON_SYNONYMOUS_CODING                       | Q/R    | glutathionylspermidine synthase-like protein                                                                  | GO:0051607 (defense response to virus)                                                                                                                                                                                                                                                                                                                                                                                    |
| SecY122a.E3 | indel | 3241660 | 3241660 | G | - | <i>sstI</i>       | FRAMESHIFT_CODING                           | -      | pseudogene                                                                                                    | GO:0003333 (amino acid transmembrane transport)<br>GO:0006865 (amino acid transport)<br>GO:0006835 (dicarboxylic acid transport)<br>GO:0013229 (serine transport)<br>GO:0015826 (threonine transport)                                                                                                                                                                                                                     |
| SecY122a.E3 | snp   | 3331601 | 3331601 | T | C | <i>obgE</i>       | SYNONYMOUS_CODING                           | L      | GTPase involved in cell partitioning and DNA repair                                                           | GO:0007059 (chromosome segregation)<br>GO:0006154 (GTP catabolic process)<br>GO:0042255 (ribosome assembly)                                                                                                                                                                                                                                                                                                               |

**Supplementary Table 9: Escape mechanisms of higher-order, MutS-proficient strains with multiple essential TAG codons.**

| Escape mutant   | Essential genes         | Causative SNP <sup>a</sup> | Causative SNP location <sup>b</sup> | Suppressor type | Relative fitness in media without sAA <sup>c</sup> |
|-----------------|-------------------------|----------------------------|-------------------------------------|-----------------|----------------------------------------------------|
| rEc.β.dB.9'.E1  | <i>dnaX, lspA</i>       | Gta→Tta                    | <i>tyrV'</i> → <i>supC</i>          | ochre (TAA)     | 0.83 ± 0.006                                       |
| rEc.β.dB.9'.E2  | <i>dnaX, lspA</i>       | Gta→Tta                    | <i>tyrV'</i> → <i>supC</i>          | ochre (TAA)     | 0.83 ± 0.009                                       |
| rEc.β.dB.9'.E3  | <i>dnaX, lspA</i>       | Gta→Cta                    | <i>tyrT'</i> → <i>supF</i>          | amber (TAG)     | 0.88 ± 0.010                                       |
| rEc.β.dC.12'.E5 | <i>dnaX, lspA, secY</i> | Gta→Cta                    | <i>tyrU'</i> → <i>supZ</i>          | amber (TAG)     | 0.85 ± 0.019                                       |
| rEc.β.dC.12'.E7 | <i>dnaX, lspA, secY</i> | Gta→Tta                    | <i>tyrT'</i> → <i>supC</i>          | ochre (TAA)     | 0.78 ± 0.012                                       |
| rEc.β.dC.12'.E8 | <i>dnaX, lspA, secY</i> | Gta→Tta                    | <i>tyrT'</i> → <i>supC</i>          | ochre (TAA)     | 0.80 ± 0.012                                       |
| rEc.γ.dB.41'.E1 | <i>dnaA, murG</i>       | Gta→Cta                    | <i>tyrT'</i> → <i>supF</i>          | amber (TAG)     | 0.48 ± 0.008                                       |
| rEc.γ.dB.41'.E2 | <i>dnaA, murG</i>       | Gta→Cta                    | <i>tyrV'</i> → <i>supF</i>          | amber (TAG)     | 0.48 ± 0.063                                       |
| rEc.γ.dB.41'.E3 | <i>dnaA, murG</i>       | Gta→Cta                    | <i>tyrU'</i> → <i>supZ</i>          | amber (TAG)     | 0.50 ± 0.072                                       |
| rEc.γ.dB.46'.E4 | <i>dnaA, murG, serS</i> | Gta→Cta                    | <i>tyrV'</i> → <i>supF</i>          | amber (TAG)     | 0.56 ± 0.093                                       |
| rEc.γ.dB.46'.E5 | <i>dnaA, murG, serS</i> | Gta→Cta                    | <i>tyrV'</i> → <i>supF</i>          | amber (TAG)     | 0.62 ± 0.040                                       |
| rEc.γ.dB.46'.E6 | <i>dnaA, murG, serS</i> | Gta→Cta                    | <i>tyrV'</i> → <i>supF</i>          | amber (TAG)     | 0.57 ± 0.036                                       |

<sup>a</sup>Causative SNP is capitalized within the codon or anticodon sequence, from 5' to 3', for protein and tRNA-encoded genes, respectively.

<sup>b</sup>tRNA suppressor name conferred by the anticodon mutation is shown.

<sup>c</sup>Average ratio of doubling times are shown for contained ancestor grown to escape mutant grown in permissive and nonpermissive media, respectively; n=3 technical replicates; error is ±s.d.



**Supplementary Table 10: Whole genome sequencing of higher-order MutS-proficient strains with multiple essential TAG codons.**

| Strain      | Feature | Start  | End    | WT                    | Mut                         | Gene        | Consequence                                 | AA change | Product                                                                 | GO Annotation (Biological process)                                                                                                                                                       |
|-------------|---------|--------|--------|-----------------------|-----------------------------|-------------|---------------------------------------------|-----------|-------------------------------------------------------------------------|------------------------------------------------------------------------------------------------------------------------------------------------------------------------------------------|
| Ec:ΔC:9:E1  | snp     | 74910  | 74910  | C                     | T                           | <i>nibB</i> | SYNONYMOUS_CODING                           | L         | thiamin ABC transporter and periplasmic binding protein                 | GO:000200 (ATP catabolic process)<br>GO:000810 (transport)                                                                                                                               |
| Ec:ΔC:9:E1  | snp     | 129310 | 129310 | C                     | A                           | <i>trpI</i> | NON_SYNONYMOUS_CODING                       | na        | tRNA-try                                                                | GO:001588 (thiamine transport)<br>GO:005585 (transmembrane transport)                                                                                                                    |
| Ec:ΔC:9:E1  | indel   | 286207 | 286207 | ACTGACGA              | CCTTTATTCTCG                | <i>ppbB</i> | UPSTREAM (+61)                              | -         | protein-tyrosine-phosphatase phosphoprotein phosphatase                 | GO:000812 (metabolic process)<br>GO:001611 (dephosphorylation)                                                                                                                           |
| Ec:ΔC:9:E2  | snp     | 223618 | 223618 | G                     | G                           | <i>osfI</i> | NON_SYNONYMOUS_CODING                       | na        | 16S ribosomal RNA                                                       | GO:0006412 (translation)                                                                                                                                                                 |
| Ec:ΔC:9:E2  | indel   | 890767 | 890767 | CGAA                  | CAGCATCACC                  | <i>mdf1</i> | UPSTREAM (-12)                              | -         | multidrug efflux system protein                                         | GO:000855 (drug transmembrane transport)<br>GO:003641 (regulation of cellular pH)<br>GO:0046677 (response to antibiotic)<br>GO:005585 (transmembrane transport)<br>GO:000810 (transport) |
| Ec:ΔC:9:E2  | snp     | 890782 | 890782 | C                     | T                           | <i>mdf1</i> | STOP_GAINED                                 | Q*        | multidrug efflux system protein                                         | GO:000855 (drug transmembrane transport)<br>GO:003641 (regulation of cellular pH)<br>GO:0046677 (response to antibiotic)<br>GO:005585 (transmembrane transport)<br>GO:000810 (transport) |
| Ec:ΔC:9:E2  | snp     | 129310 | 129310 | C                     | A                           | <i>trpI</i> | NON_SYNONYMOUS_CODING                       | na        | tRNA-try                                                                | Not found                                                                                                                                                                                |
| Ec:ΔC:9:E2  | indel   | 243482 | 243482 | GCATCAATAAAAATGGCCGTA | TCCTGAGTAGGACAAATCCCGCCCTAG | <i>cypI</i> | UPSTREAM (-90)                              | -         | membrane protein required for colicin V production                      | GO:000403 (toxin biosynthetic process)                                                                                                                                                   |
| Ec:ΔC:9:E2  | indel   | 286157 | 286157 | GGGTG                 | GCAGTA                      | <i>mus5</i> | FRAMESHIFT_CODING                           | -         | DNA mismatch repair protein                                             | GO:000018 (regulation of DNA recombination)<br>GO:000200 (ATP catabolic process)<br>GO:0006298 (mismatch repair)<br>GO:0006974 (cellular response to DNA damage stimulus)                |
| Ec:ΔC:9:E2  | indel   | 286163 | 286163 | TG                    | CT                          | <i>mus5</i> | NON_SYNONYMOUS_CODING,<br>SYNONYMOUS_CODING | V,D,Y     | DNA mismatch repair protein                                             | GO:000018 (regulation of DNA recombination)<br>GO:000200 (ATP catabolic process)<br>GO:0006298 (mismatch repair)<br>GO:0006974 (cellular response to DNA damage stimulus)                |
| Ec:ΔC:9:E2  | snp     | 286204 | 286204 | A                     | C                           | <i>ppbB</i> | UPSTREAM (-54)                              | -         | protein-tyrosine-phosphatase phosphoprotein phosphatase                 | GO:000812 (metabolic process)<br>GO:001611 (dephosphorylation)                                                                                                                           |
| Ec:ΔC:9:E3  | snp     | 374183 | 374183 | G                     | C                           | <i>nbpT</i> | UPSTREAM (-327)                             | -         | 3-hydroxyphenyl(propionate)-3-hydroxycinnamate-H <sup>+</sup> symporter | GO:001371 (3-hydroxyphenyl propionate transport)<br>GO:004206 (3-hydroxyphenyl propionate acid transport)<br>GO:000810 (transport)                                                       |
| Ec:ΔC:9:E3  | snp     | 890782 | 890782 | C                     | T                           | <i>mdf1</i> | STOP_GAINED                                 | Q*        | multidrug efflux system protein                                         | GO:000855 (drug transmembrane transport)<br>GO:003641 (regulation of cellular pH)<br>GO:0046677 (response to antibiotic)<br>GO:005585 (transmembrane transport)<br>GO:000810 (transport) |
| Ec:ΔC:9:E3  | snp     | 129304 | 129304 | C                     | G                           | <i>trpI</i> | NON_SYNONYMOUS_CODING                       | na        | tRNA-try                                                                | Not found                                                                                                                                                                                |
| Ec:ΔC:9:E3  | indel   | 243490 | 243490 | TGAAA                 | CGCCCTAG                    | <i>cypI</i> | UPSTREAM (-109)                             | -         | membrane protein required for colicin V production                      | GO:000403 (toxin biosynthetic process)                                                                                                                                                   |
| Ec:ΔC:9:E3  | snp     | 286154 | 286154 | G                     | A                           | <i>mus5</i> | NON_SYNONYMOUS_CODING                       | M,I       | DNA mismatch repair protein                                             | GO:000018 (regulation of DNA recombination)<br>GO:000200 (ATP catabolic process)<br>GO:0006298 (mismatch repair)<br>GO:0006974 (cellular response to DNA damage stimulus)                |
| Ec:ΔC:9:E3  | indel   | 417344 | 417344 | GAACCGTAGGG           | CAICATGAGT                  | <i>trpB</i> | NON_SYNONYMOUS_CODING                       | na        | 23S ribosomal RNA                                                       | GO:0006412 (translation)                                                                                                                                                                 |
| Ec:ΔC:9:E3  | indel   | 417360 | 417360 | UCFACAAAGCGGAA        | ACGGTCACAGCTTG              | <i>trpB</i> | NON_SYNONYMOUS_CODING                       | na        | 23S ribosomal RNA                                                       | GO:0006412 (translation)                                                                                                                                                                 |
| Ec:ΔC:12:E5 | snp     | 890780 | 890780 | T                     | G                           | <i>mdf1</i> | START_REMOVED                               | MR        | multidrug efflux system protein                                         | GO:000855 (drug transmembrane transport)<br>GO:003641 (regulation of cellular pH)<br>GO:0046677 (response to antibiotic)<br>GO:005585 (transmembrane transport)<br>GO:000810 (transport) |
| Ec:ΔC:12:E5 | snp     | 890782 | 890782 | C                     | T                           | <i>mdf1</i> | STOP_GAINED                                 | Q*        | multidrug efflux system protein                                         | GO:000855 (drug transmembrane transport)<br>GO:003641 (regulation of cellular pH)<br>GO:0046677 (response to antibiotic)<br>GO:005585 (transmembrane transport)<br>GO:000810 (transport) |
| Ec:ΔC:12:E5 | snp     | 243496 | 243496 | A                     | G                           | <i>cypI</i> | UPSTREAM (-114)                             | -         | membrane protein required for colicin V production                      | GO:000403 (toxin biosynthetic process)                                                                                                                                                   |
| Ec:ΔC:12:E5 | indel   | 243498 | 243498 | ATA                   | ACTT                        | <i>cypI</i> | UPSTREAM (-116)                             | -         | membrane protein required for colicin V production                      | GO:000403 (toxin biosynthetic process)                                                                                                                                                   |
| Ec:ΔC:12:E5 | snp     | 417325 | 417325 | G                     | C                           | <i>trpI</i> | NON_SYNONYMOUS_CODING                       | na        | tRNA-try                                                                | Not found                                                                                                                                                                                |
| Ec:ΔC:12:E5 | snp     | 129304 | 129304 | C                     | A                           | <i>trpI</i> | NON_SYNONYMOUS_CODING                       | na        | tRNA-try                                                                | Not found                                                                                                                                                                                |
| Ec:ΔC:12:E5 | snp     | 129304 | 129304 | C                     | A                           | <i>trpI</i> | NON_SYNONYMOUS_CODING                       | na        | tRNA-try                                                                | Not found                                                                                                                                                                                |
| Ec:ΔC:12:E5 | snp     | 239091 | 239091 | G                     | A                           | <i>yjgM</i> | UPSTREAM (-72)                              | -         | predicted protein                                                       | Not found                                                                                                                                                                                |
| Ec:ΔC:12:E5 | snp     | 243496 | 243496 | A                     | G                           | <i>cypI</i> | UPSTREAM (-114)                             | -         | membrane protein required for colicin V production                      | GO:000403 (toxin biosynthetic process)                                                                                                                                                   |
| Ec:ΔC:12:E5 | indel   | 243498 | 243498 | ATA                   | ACTT                        | <i>cypI</i> | UPSTREAM (-116)                             | -         | membrane protein required for colicin V production                      | GO:000403 (toxin biosynthetic process)                                                                                                                                                   |
| Ec:ΔC:12:E5 | indel   | 286157 | 286157 | GGGTG                 | GCAGTA                      | <i>mus5</i> | FRAMESHIFT_CODING                           | -         | DNA mismatch repair protein                                             | GO:000018 (regulation of DNA recombination)<br>GO:000200 (ATP catabolic process)<br>GO:0006298 (mismatch repair)<br>GO:0006974 (cellular response to DNA damage stimulus)                |
| Ec:ΔC:12:E5 | indel   | 286207 | 286207 | ACTGACGA              | CCTTTATTCTCG                | <i>ppbB</i> | UPSTREAM (-61)                              | -         | protein-tyrosine-phosphatase phosphoprotein phosphatase                 | GO:000812 (metabolic process)<br>GO:001611 (dephosphorylation)                                                                                                                           |
| Ec:ΔC:12:E5 | indel   | 286207 | 286207 | ACTGACGA              | CCTTTATTCTCG                | <i>ppbB</i> | UPSTREAM (-61)                              | -         | protein-tyrosine-phosphatase phosphoprotein phosphatase                 | GO:000812 (metabolic process)<br>GO:001611 (dephosphorylation)                                                                                                                           |
| Ec:ΔC:12:E5 | snp     | 404245 | 404245 | G                     | A                           | <i>trpI</i> | UPSTREAM (-11)                              | -         | 5S ribosomal RNA                                                        | Not found                                                                                                                                                                                |
| Ec:ΔC:41:E1 | indel   | 890767 | 890767 | CGAA                  | CAGCATCACC                  | <i>mdf1</i> | UPSTREAM (-12)                              | -         | multidrug efflux system protein                                         | GO:000855 (drug transmembrane transport)<br>GO:003641 (regulation of cellular pH)<br>GO:0046677 (response to antibiotic)<br>GO:005585 (transmembrane transport)<br>GO:000810 (transport) |
| Ec:ΔC:41:E1 | snp     | 129304 | 129304 | C                     | G                           | <i>trpI</i> | NON_SYNONYMOUS_CODING                       | na        | tRNA-try                                                                | Not found                                                                                                                                                                                |
| Ec:ΔC:41:E1 | indel   | 243489 | 243489 | GCTGAAA               | CTCTAG                      | <i>cypI</i> | UPSTREAM (-107)                             | -         | membrane protein required for colicin V production                      | GO:000403 (toxin biosynthetic process)                                                                                                                                                   |
| Ec:ΔC:41:E1 | snp     | 271460 | 271460 | A                     | C                           | <i>yjgM</i> | UPSTREAM (-273)                             | -         | CP4-57 phosphatase, predicted GTP-binding protein                       | Not found                                                                                                                                                                                |
| Ec:ΔC:41:E1 | indel   | 286157 | 286157 | GGGTGTT               | GCAGTAICTCA                 | <i>mus5</i> | FRAMESHIFT_CODING                           | -         | DNA mismatch repair protein                                             | GO:000018 (regulation of DNA recombination)<br>GO:000200 (ATP catabolic process)<br>GO:0006298 (mismatch repair)<br>GO:0006974 (cellular response to DNA damage stimulus)                |
| Ec:ΔC:41:E1 | indel   | 286207 | 286207 | ACTGACGA              | TTTTATTCTCG                 | <i>ppbB</i> | UPSTREAM (-61)                              | -         | protein-tyrosine-phosphatase phosphoprotein phosphatase                 | GO:000812 (metabolic process)<br>GO:001611 (dephosphorylation)                                                                                                                           |
| Ec:ΔC:41:E1 | snp     | 404245 | 404245 | G                     | A                           | <i>trpI</i> | UPSTREAM (-11)                              | -         | 5S ribosomal RNA                                                        | Not found                                                                                                                                                                                |
| Ec:ΔC:41:E2 | indel   | 890767 | 890767 | CGAA                  | CAGCATCACC                  | <i>mdf1</i> | UPSTREAM (-12)                              | -         | multidrug efflux system protein                                         | GO:000855 (drug transmembrane transport)<br>GO:003641 (regulation of cellular pH)<br>GO:0046677 (response to antibiotic)<br>GO:005585 (transmembrane transport)<br>GO:000810 (transport) |
| Ec:ΔC:41:E2 | snp     | 129310 | 129310 | C                     | G                           | <i>trpI</i> | NON_SYNONYMOUS_CODING                       | na        | tRNA-try                                                                | GO:0006412 (translation)                                                                                                                                                                 |
| Ec:ΔC:41:E2 | snp     | 239091 | 239091 | C                     | T                           | <i>yjgM</i> | UPSTREAM (-51)                              | -         | predicted protein                                                       | Not found                                                                                                                                                                                |
| Ec:ΔC:41:E2 | indel   | 271460 | 271460 | A                     | AC                          | <i>yjgM</i> | UPSTREAM (-273)                             | -         | CP4-57 phosphatase, predicted GTP-binding protein                       | Not found                                                                                                                                                                                |
| Ec:ΔC:41:E2 | indel   | 286157 | 286157 | G                     | GC                          | <i>mus5</i> | FRAMESHIFT_CODING                           | -         | DNA mismatch repair protein                                             | GO:000018 (regulation of DNA recombination)<br>GO:000200 (ATP catabolic process)<br>GO:0006298 (mismatch repair)<br>GO:0006974 (cellular response to DNA damage stimulus)                |
| Ec:ΔC:41:E2 | snp     | 286158 | 286158 | G                     | A                           | <i>mus5</i> | FRAMESHIFT_CODING                           | GS        | DNA mismatch repair protein                                             | GO:000200 (ATP catabolic process)<br>GO:0006298 (mismatch repair)<br>GO:0006974 (cellular response to DNA damage stimulus)                                                               |
| Ec:ΔC:41:E2 | indel   | 286207 | 286207 | ACTGACGA              | TTTTATTCTCG                 | <i>ppbB</i> | UPSTREAM (-61)                              | -         | protein-tyrosine-phosphatase phosphoprotein phosphatase                 | GO:000812 (metabolic process)<br>GO:001611 (dephosphorylation)                                                                                                                           |
| Ec:ΔC:41:E2 | snp     | 404245 | 404245 | G                     | A                           | <i>trpI</i> | UPSTREAM (-11)                              | -         | 5S ribosomal RNA                                                        | Not found                                                                                                                                                                                |
| Ec:ΔC:41:E3 | snp     | 890780 | 890780 | T                     | G                           | <i>mdf1</i> | START_REMOVED                               | MR        | multidrug efflux system protein                                         | GO:000855 (drug transmembrane transport)<br>GO:003641 (regulation of cellular pH)<br>GO:0046677 (response to antibiotic)<br>GO:005585 (transmembrane transport)<br>GO:000810 (transport) |
| Ec:ΔC:41:E3 | snp     | 890782 | 890782 | C                     | T                           | <i>mdf1</i> | STOP_GAINED                                 | Q*        | multidrug efflux system protein                                         | GO:000855 (drug transmembrane transport)<br>GO:003641 (regulation of cellular pH)<br>GO:0046677 (response to antibiotic)<br>GO:005585 (transmembrane transport)<br>GO:000810 (transport) |
| Ec:ΔC:41:E3 | snp     | 121489 | 121489 | C                     | G                           | <i>trpI</i> | NON_SYNONYMOUS_CODING                       | L,V       | uncharacterized protein from lambdaoid prophage                         | Not found                                                                                                                                                                                |
| Ec:ΔC:41:E3 | indel   | 243498 | 243498 | ATA                   | ACTT                        | <i>cypI</i> | UPSTREAM (-116)                             | -         | membrane protein required for colicin V production                      | GO:000403 (toxin biosynthetic process)                                                                                                                                                   |
| Ec:ΔC:41:E3 | indel   | 271460 | 271460 | A                     | AC                          | <i>yjgM</i> | UPSTREAM (-273)                             | -         | CP4-57 phosphatase, predicted GTP-binding protein                       | Not found                                                                                                                                                                                |
| Ec:ΔC:41:E3 | indel   | 286204 | 286204 | GACGA                 | YCTGC                       | <i>ppbB</i> | UPSTREAM (-58)                              | -         | protein-tyrosine-phosphatase phosphoprotein phosphatase                 | GO:000812 (metabolic process)                                                                                                                                                            |
| Ec:ΔC:41:E3 | snp     | 417325 | 417325 | G                     | C                           | <i>trpI</i> | NON_SYNONYMOUS_CODING                       | na        | tRNA-try                                                                | Not found                                                                                                                                                                                |

**Supplementary Table 11: Frequencies of escape for sAA-dependent strains over time.**

| Genotype                           | EF Day 1   | EF Day 2   | EF Day 3   | EF Day 4   | EF Day 5   | EF Day 7   |
|------------------------------------|------------|------------|------------|------------|------------|------------|
| DnaA.W6 $\gamma$                   | 7.81E-08   | 9.79E-06   | 1.19E-05   | 1.42E-05   | 1.42E-05   | 1.46E-05   |
| rEc. $\beta$ .dC.12                | 3.31E-09   | 9.93E-09   | 1.48E-07   | 2.49E-07   | 4.51E-07   | 1.44E-06   |
| rEc. $\beta$ .dC.12'               | 3.79E-09   | 3.41E-08   | 1.52E-07   | 1.67E-07   | 2.02E-07   | 5.49E-07   |
| rEc. $\beta$ .dC.12'. $\Delta$ tY  | < 4.85E-12 |
| rEc. $\gamma$ .dB.41               | 2.17E-09   | 3.62E-09   | 5.07E-09   | 5.07E-09   | 5.80E-09   | 6.52E-09   |
| rEc. $\gamma$ .dB.41'              | 5.98E-10   | 1.56E-07   | 1.82E-07   | 2.08E-07   | 2.08E-07   | 2.08E-07   |
| rEc. $\gamma$ .dC.46               | < 4.03E-11 | 5.05E-10   | 3.53E-09   | 4.50E-09   | 4.75E-09   | 5.13E-09   |
| rEc. $\gamma$ .dC.46'              | < 4.36E-11 | 5.80E-09   | 9.02E-09   | 1.05E-08   | 1.12E-08   | 1.21E-08   |
| rEc. $\gamma$ .dC.46'. $\Delta$ tY | < 6.30E-12 |

Representative EFs are shown (see methods).
